# Supplementary material for: Acute COVID-19 severity and 16-month mental morbidity trajectories in patient populations of six nations
Source: bioRxiv or medRxiv preprint supplement (doi:10.1101/2021.12.13.21267368), 2021-12-15
Supplement: Supplementary file [file media-1.pdf]

## Supplementary Material

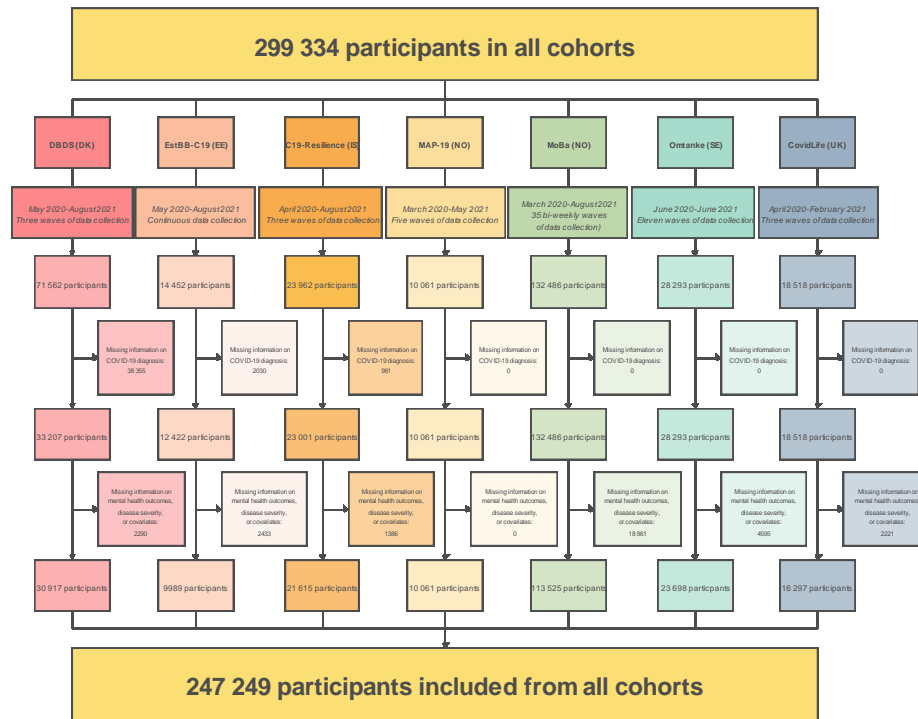

Figure S1: Flowchart of participation and exclusions in each cohort yielding the study population.

**Table S1: Overview of information and various measures used in study**

|                                             | <b>Denmark</b><br>DBDS                                                                                                                          | <b>Estonia</b><br>EstBB-C19                                      | <b>Iceland</b><br>C19-<br>Resilience                                                                    | <b>Norway</b><br>MAP-19                                                  | <b>Norway</b><br>MoBa                                                            | <b>Sweden</b><br>Omtanke2020                                                                                        | <b>UK</b><br>CovidLife                                                  |
|---------------------------------------------|-------------------------------------------------------------------------------------------------------------------------------------------------|------------------------------------------------------------------|---------------------------------------------------------------------------------------------------------|--------------------------------------------------------------------------|----------------------------------------------------------------------------------|---------------------------------------------------------------------------------------------------------------------|-------------------------------------------------------------------------|
| <b>Ethical approvals</b>                    |                                                                                                                                                 |                                                                  |                                                                                                         |                                                                          |                                                                                  |                                                                                                                     |                                                                         |
|                                             | Zealand and Central Denmark Regional Committees on Health Research Ethics (SJ-740 and 1-10-72-95-13) and the Data Protection Agency (P-2019-99) | Estonian Committee on Bioethics and Human Research (1.1-12/1277) | National Bioethics Committee (NBC no. 20-073, 21-071) as well as the National Data Protection Authority | Regional Committee for Medical Research Ethics, reference number: 125510 | Regional Committees for Medical and Health Research Ethics (127708/1414 0/20138) | Ethical approval no. 2020-01785                                                                                     | East of Scotland Research Ethics Service (EoSRES)                       |
| <b>COVID-19 related outcomes</b>            |                                                                                                                                                 |                                                                  |                                                                                                         |                                                                          |                                                                                  |                                                                                                                     |                                                                         |
| <b>COVID-19 diagnosis</b>                   | Self-report of confirmed PCR-test                                                                                                               | Self-report of confirmed PCR-test                                | Self-report of confirmed PCR-test                                                                       | Self-report of confirmed PCR-test                                        | Self-report of confirmed PCR-test                                                | Self-report of confirmed PCR-test or positive antibody test with date of testing provided                           | Self-report of confirmed PCR-test                                       |
| <b>COVID-19 illness severity</b>            | Never bedridden/Bedridden 1 day or more                                                                                                         | No fever/ Fever 1-6 days/Fever 7 days or more                    | Never bedridden/Bedridden 1-6 days/Bedridden 7 days or more                                             | Not measured                                                             | Never bedridden/Bedridden 1-6 days/Bedridden 7 days or more                      | Never bedridden/Bedridden 1-6 days/Bedridden 7 days or more (only asked at long surveys (baseline and 6-months FU)) | Not measured                                                            |
| <b>COVID-19 hospitalization</b>             | Not measured                                                                                                                                    | Non-hospitalized/Hospitalized (non-ICU)/Hospitalized (ICU)       | Non-hospitalized/Hospitalized (non-ICU)/Hospitalized (ICU)                                              | Not measured                                                             | Non-hospitalized/Hospitalized                                                    | Non-hospitalized/Hospitalized (non-ICU)/Hospitalized (ICU)                                                          | Non-hospitalized/Hospitalized (non-ICU)/Hospitalized (ICU)              |
| <b>Mental health instruments</b>            |                                                                                                                                                 |                                                                  |                                                                                                         |                                                                          |                                                                                  |                                                                                                                     |                                                                         |
| <b>Depression</b>                           | PHQ-9                                                                                                                                           | EST-Q2                                                           | PHQ-9                                                                                                   | PHQ-9                                                                    | PHQ-9                                                                            | PHQ-9                                                                                                               | PHQ-9                                                                   |
| <b>Anxiety</b>                              | ASS                                                                                                                                             | EST-Q2                                                           | GAD-7                                                                                                   | GAD-7                                                                    | GAD-7                                                                            | GAD-7                                                                                                               | GAD-7                                                                   |
| <b>COVID-19 related distress</b>            | PC-PTSD-5 (modified)                                                                                                                            | Not measured                                                     | PC-PTSD-5 (modified)                                                                                    | PCL-5                                                                    | PC-PTSD-5 (modified)                                                             | PC-PTSD-5 (modified)                                                                                                | Not measured                                                            |
| <b>Sleep quality</b>                        | Not measured                                                                                                                                    | EST-Q2                                                           | PSQI                                                                                                    | Not measured                                                             | PSQI                                                                             | One item of PSQI                                                                                                    | Binary variable of better/same sleep quality versus worse sleep quality |
| <b>Covariates</b>                           |                                                                                                                                                 |                                                                  |                                                                                                         |                                                                          |                                                                                  |                                                                                                                     |                                                                         |
| <b>Age</b>                                  | x                                                                                                                                               | x                                                                | x                                                                                                       | x                                                                        | x                                                                                | x                                                                                                                   | x                                                                       |
| <b>Gender</b>                               | x                                                                                                                                               | x                                                                | x                                                                                                       | x                                                                        | x                                                                                | x                                                                                                                   | x                                                                       |
| <b>Education</b>                            | x                                                                                                                                               | x                                                                | x                                                                                                       | x                                                                        | x                                                                                | —                                                                                                                   | x                                                                       |
| <b>Relationship status</b>                  | x                                                                                                                                               | —                                                                | x                                                                                                       | x                                                                        | —                                                                                | x                                                                                                                   | x                                                                       |
| <b>Smoking</b>                              | x                                                                                                                                               | x                                                                | x                                                                                                       | x                                                                        | x                                                                                | x                                                                                                                   | x                                                                       |
| <b>BMI</b>                                  | x                                                                                                                                               | x                                                                | x                                                                                                       | x                                                                        | x                                                                                | x                                                                                                                   | x                                                                       |
| <b>Pre-existing psychiatric conditions</b>  | *                                                                                                                                               | *                                                                | x                                                                                                       | x                                                                        | x                                                                                | x                                                                                                                   | x                                                                       |
| <b>Number of chronic medical conditions</b> | x                                                                                                                                               | x                                                                | x                                                                                                       | —                                                                        | x                                                                                | x                                                                                                                   | x                                                                       |
| <b>Response period</b>                      | x                                                                                                                                               | x                                                                | x                                                                                                       | x                                                                        | x                                                                                | x                                                                                                                   | x                                                                       |

Note: Data from surveys are marked with x; register data is marked with a \*. "x" and "\*" denotes covariates

were included in model while "—" indicates covariate was not included

**Table S2: Background characteristics of study participants that received a COVID-19 diagnosis at any time point and others in the seven COVIDMENT cohorts separately, combined, and combined with all missing values removed**

|                                       | Denmark            |               | Estonia            |             | Iceland            |               | Norway             |               |                    |                | Sweden             |               | United Kingdom     |               | Overall            |               | Overall                |               |
|---------------------------------------|--------------------|---------------|--------------------|-------------|--------------------|---------------|--------------------|---------------|--------------------|----------------|--------------------|---------------|--------------------|---------------|--------------------|---------------|------------------------|---------------|
|                                       | (DBDS)             |               | (EstBB C-19)       |             | (C19-Resilience)   |               | (MAP-19)           |               | (MoBa)             |                | (Omtanke)          |               | (CovidLife)        |               |                    |               | without missing values |               |
|                                       | (N=30 917)         |               | (N=9989)           |             | (N=21 615)         |               | (N = 10 061)       |               | (N=132 451)        |                | (N=23 698)         |               | (N=18 518)         |               | (N= 247 249)       |               | (N=247 249)            |               |
|                                       | COVID-19 diagnosis | Others        | COVID-19 diagnosis | Others      | COVID-19 diagnosis | Others        | COVID-19 diagnosis | Others        | COVID-19 diagnosis | Others         | COVID-19 diagnosis | Others        | COVID-19 diagnosis | Others        | COVID-19 diagnosis | Others        | COVID-19 diagnosis     | Others        |
| n (%)                                 | n (%)              | n (%)         | n (%)              | n (%)       | n (%)              | n (%)         | n (%)              | n (%)         | n (%)              | n (%)          | n (%)              | n (%)         | n (%)              | n (%)         | n (%)              | n (%)         | n (%)                  | n (%)         |
| <b>Total</b>                          | 1111 (3.5)         | 29 806 (96.4) | 2121 (21.2)        | 7868 (78.8) | 1144 (5.3)         | 20 471 (94.7) | 110 (1.1)          | 9951 (98.9)   | 1995 (1.5)         | 130 456 (98.5) | 3175 (13.4)        | 20 523 (86.6) | 323 (1.7)          | 18 195 (98.2) | 9979 (4)           | 237270 (96)   | 9979 (4)               | 237270 (96)   |
| <b>Gender</b>                         |                    |               |                    |             |                    |               |                    |               |                    |                |                    |               |                    |               |                    |               |                        |               |
| Male                                  | 513 (46.2)         | 14 341 (48.1) | 740 (34.9)         | 2224 (28.3) | 424 (37.1)         | 6125 (29.9)   | 17 (15.5)          | 2166 (21.8)   | 815 (40.9)         | 56 098 (43.0)  | 607 (19.1)         | 3796 (18.5)   | 86 (26.6)          | 5928 (32.6)   | 3202 (32.1)        | 90678 (38.2)  | 3202 (32.1)            | 90678 (38.2)  |
| Female                                | 598 (53.8)         | 15 465 (51.9) | 1381 (65.1)        | 5664 (71.7) | 718 (62.8)         | 14 309 (69.9) | 92 (83.6)          | 7760 (78.0)   | 1180 (59.1)        | 74 358 (57.0)  | 2568 (80.9)        | 16 727 (81.5) | 235 (72.8)         | 12 138 (66.7) | 6772 (67.9)        | 146401 (61.7) | 6772 (67.9)            | 146401 (61.7) |
| Other                                 | —                  | —             | —                  | —           | 2 (0.2)            | 37 (0.2)      | 1 (0.9)            | 25 (0.3)      | —                  | —              | **                 | **            | —                  | —             | 3 (0)              | 62 (0)        | 3 (0)                  | 62 (0)        |
| Missing                               | —                  | —             | —                  | —           | —                  | —             | —                  | —             | —                  | —              | —                  | —             | 2 (0.6)            | 129 (0.7)     | 2 (0)              | 129 (0.1)     | 2 (0)                  | 129 (0.1)     |
| <b>Age</b>                            |                    |               |                    |             |                    |               |                    |               |                    |                |                    |               |                    |               |                    |               |                        |               |
| Mean age (SD)                         | 46.6 (14.8)        | 54.6 (16.6)   | 44.5 (13.4)        | 44.7 (13.3) | 48.2 (14.7)        | 54.8 (14.1)   | 33.3 (12.2)        | 35.7 (13.5)   | 47.1 (5.41)        | 46.7 (5.39)    | 47.1 (13.8)        | 50.4 (16.1)   | 52.4 (13.5)        | 56.5 (14.3)   | 46.6               | 48.9          | 46.6                   | 48.9          |
| 18-29 years                           | 200 (18.0)         | 3053 (10.2)   | 273 (12.9)         | 970 (12.3)  | 168 (14.7)         | 1216 (5.9)    | 54 (49.1)          | 4349 (43.7)   | —                  | —              | 419 (13.2)         | 2532 (12.3)   | 23 (7.1)           | 964 (5.3)     | 1137 (11.4)        | 13084 (5.5)   | 1137 (11.4)            | 13084 (5.5)   |
| 30-39 years                           | 194 (17.5)         | 3554 (11.9)   | 573 (27.0)         | 2143 (27.2) | 154 (13.5)         | 1974 (9.6)    | 23 (20.9)          | 2254 (22.7)   | 154 (7.7)          | 11 039 (8.5)   | 565 (17.8)         | 3542 (17.3)   | 38 (11.8)          | 1760 (9.7)    | 1701 (17)          | 26266 (11.1)  | 1701 (17.1)            | 26266 (11.1)  |
| 40-49 years                           | 261 (23.5)         | 4911 (16.5)   | 563 (26.5)         | 1963 (24.9) | 259 (22.6)         | 3620 (17.7)   | 21 (19.1)          | 1567 (15.7)   | 1232 (61.8)        | 81 932 (62.8)  | 677 (21.3)         | 3596 (17.5)   | 59 (18.3)          | 2508 (13.8)   | 3072 (30.8)        | 100097 (42.2) | 3072 (30.8)            | 100097 (42.2) |
| 50-59 years                           | 244 (22.0)         | 6152 (20.5)   | 396 (18.7)         | 1607 (20.4) | 284 (24.8)         | 5280 (25.8)   | 6 (5.5)            | 1088 (10.9)   | 575 (28.8)         | 35 620 (27.3)  | 908 (28.6)         | 4300 (21.0)   | 99 (30.7)          | 3955 (21.7)   | 2512 (25.2)        | 58002 (24.4)  | 2512 (25.2)            | 58002 (24.4)  |
| 60-69 years                           | 117 (10.5)         | 4386 (14.7)   | 221 (10.4)         | 856 (10.9)  | 206 (18.0)         | 5335 (26.1)   | 5 (4.5)            | 557 (5.6)     | 33 (1.7)           | 1768 (1.4)     | 462 (14.6)         | 3505 (17.1)   | 74 (22.9)          | 5454 (30.0)   | 1118 (11.2)        | 21861 (9.2)   | 1118 (11.2)            | 21861 (9.2)   |
| 70 years +                            | 95 (8.6)           | 7750 (26.0)   | 95 (4.5)           | 329 (4.2)   | 73 (6.4)           | 3046 (14.9)   | 1 (0.9)            | 136 (1.4)     | 1 (0.1)            | 97 (0.1)       | 144 (4.5)          | 3048 (14.9)   | 26 (8.0)           | 3348 (18.4)   | 435 (4.4)          | 17754 (7.5)   | 435 (4.4)              | 17754 (7.5)   |
| Missing                               | —                  | —             | —                  | —           | —                  | —             | —                  | —             | —                  | —              | —                  | —             | 4 (1.2)            | 206 (1.1)     | 4 (0)              | 206 (0.1)     | 4 (0)                  | 206 (0.1)     |
| <b>Education</b>                      |                    |               |                    |             |                    |               |                    |               |                    |                |                    |               |                    |               |                    |               |                        |               |
| Compulsory                            | 30 (2.7)           | 1501 (5.0)    | 44 (2.1)           | 140 (1.8)   | 144 (12.6)         | 2916 (14.2)   | 3 (2.7)            | 519 (5.2)     | 38 (1.9)           | 3498 (2.7)     | *                  | *             | 23 (7.1)           | 1515 (8.3)    | 286 (2.9)          | 10469 (4.4)   | 290 (4.4)              | 10469 (5.2)   |
| Upper secondary, vocational or other  | 60 (5.4)           | 1144 (3.8)    | 884 (41.7)         | 2825 (35.9) | 361 (31.6)         | 6359 (31.1)   | 15 (13.6)          | 1771 (17.8)   | 606 (30.4)         | 42 530 (32.6)  | *                  | *             | 103 (31.9)         | 6050 (33.3)   | 2029 (20.3)        | 60679 (25.6)  | 2029 (30.9)            | 60679 (30)    |
| Bachelor's/ diploma university degree | 698 (62.8)         | 20 142 (67.6) | 582 (27.4)         | 2182 (27.7) | 390 (34.1)         | 6473 (31.6)   | 92 (83.6)*1        | 7661 (77.0)*1 | 661 (33.1)         | 42 765 (32.8)  | *                  | *             | 84 (26.0)          | 4120 (22.6)   | 2507 (25.1)        | 83343 (35.1)  | 2507 (38.2)            | 83343 (41.2)  |

|                                         |                |                   |                |                |            |                  |           |                  |                  |                   |               |                  |                |                  |                 |                  |                 |                  |
|-----------------------------------------|----------------|-------------------|----------------|----------------|------------|------------------|-----------|------------------|------------------|-------------------|---------------|------------------|----------------|------------------|-----------------|------------------|-----------------|------------------|
| Master's or Ph.D.                       | 323<br>(29.1)  | 7019<br>(23.5)    | 611 (28.8)     | 2721<br>(34.6) | 249 (21.8) | 4723<br>(23.1)   |           | 479 (24.0)       | 28 879<br>(22.1) | *                 | *             | 82 (25.4)        | 4444<br>(24.4) | 1744<br>(17.5)   | 47786<br>(20.1) | 1744<br>(26.5)   | 47786<br>(23.6) |                  |
| No formal education                     | —              | —                 | —              | —              | —          | —                |           | —                | —                | *                 | *             | 4 (1.2)          | 380<br>(2.1)   | 3413<br>(34.2)   | 34993<br>(14.7) |                  |                 |                  |
| Missing                                 | —              | —                 | —              | —              | —          | —                |           | 211 (10.6)       | 12 784<br>(9.8)  | *                 | *             | 27 (8.4)         | 1686<br>(9.3)  |                  |                 |                  |                 |                  |
| <b>Marital status</b>                   |                |                   |                |                |            |                  |           |                  |                  |                   |               |                  |                |                  |                 |                  |                 |                  |
| In a relationship                       | 735<br>(66.2)  | 18 901<br>(63.4)  | —              | —              | 910 (79.5) | 15 779<br>(77.1) | 64 (58.2) | 5590<br>(60.2)   | —                | —                 | 2409 (75.9)   | 15 034<br>(73.3) | 238 (73.7)     | 13 722<br>(75.4) | 4356<br>(43.7)  | 69026<br>(29.1)  | 4356<br>(74.4)  | 69026<br>(70.3)  |
| Single                                  | 376<br>(33.8)  | 10 905<br>(36.6)  | —              | —              | 234 (20.5) | 4692<br>(22.9)   | 46 (41.8) | 3961<br>(39.8)   | —                | —                 | 766 (24.1)    | 5489<br>(26.7)   | 79 (24.5)      | 4106<br>(22.6)   | 1501 (15)       | 29153<br>(12.3)  | 1501<br>(25.6)  | 29153<br>(29.7)  |
| Missing                                 | —              | —                 | —              | —              | —          | —                | —         | —                | —                | —                 | —             | —                | 6 (1.9)        | 367<br>(2.0)     | 4122<br>(41.3)  | 138691<br>(58.5) |                 |                  |
| <b>BMI (kg/m<sup>2</sup>)</b>           |                |                   |                |                |            |                  |           |                  |                  |                   |               |                  |                |                  |                 |                  |                 |                  |
| < 25, Normal weight                     | 548<br>(49.3)  | 13 441<br>(45.1)  | 980 (46.2)     | 3710<br>(47.2) | 378 (33.0) | 6028<br>(29.4)   | 33 (30.0) | 1801<br>(18.1)   | 651 (32.6)       | 34 256<br>(26.3)  | 1733 (75.9)   | 11 458<br>(55.8) | 114 (35.3)     | 6893<br>(37.9)   | 4437<br>(44.5)  | 77587<br>(32.7)  | 4437 (47)       | 77587<br>(43.7)  |
| 25-30, Overweight                       | 414<br>(37.3)  | 11 461<br>(38.5)  | 704 (33.2)     | 2521<br>(32.0) | 434 (37.9) | 8110<br>(39.6)   | 22 (20.0) | 1405<br>(14.1)   | 570 (28.6)       | 29 725<br>(22.8)  | 992<br>(31.2) | 6341<br>(30.9)   | 110 (34.1)     | 6101<br>(33.5)   | 3246<br>(32.5)  | 65664<br>(27.7)  | 3246<br>(34.4)  | 65664<br>(37)    |
| > 30, Obese                             | 149<br>(13.4)  | 4904<br>(16.5)    | 437 (20.6)     | 1637<br>(20.8) | 332 (29.0) | 6333<br>(30.9)   | 11 (10.0) | 695<br>(7.0)     | 298 (14.9)       | 13 575<br>(10.4)  | 450<br>(14.2) | 2724<br>(13.3)   | 87 (26.9)      | 4567<br>(25.1)   | 1764<br>(17.7)  | 34435<br>(14.5)  | 1764<br>(18.7)  | 34435<br>(19.4)  |
| Missing                                 | —              | —                 | —              | —              | —          | —                | 44 (40.0) | 6050<br>(60.8)   | 476 (23.9)       | 52 900<br>(40.6)  | —             | —                | 12 (3.7)       | 634<br>(3.5)     | 532 (5.3)       | 59584<br>(25.1)  |                 |                  |
| <b>Current smoking</b>                  |                |                   |                |                |            |                  |           |                  |                  |                   |               |                  |                |                  |                 |                  |                 |                  |
| No, never                               | 840<br>(75.6)  | 21 662<br>(72.7)  | 1130<br>(53.3) | 4210<br>(53.5) | 565 (49.4) | 9441<br>(46.1)   | 47 (42.7) | 2934<br>(29.5)   | 1643<br>(82.4)   | 90 547<br>(69.4)  | 1606 (50.6)   | 10 748<br>(52.4) | 187 (57.9)     | 10 757<br>(59.1) | 6018<br>(60.3)  | 150299<br>(63.3) | 6018 (62)       | 150299<br>(74.7) |
| No, former smoker                       | 198<br>(17.8)  | 5252<br>(17.6)    | 722 (34.0)     | 2515<br>(32.0) | 421 (36.8) | 7989<br>(39.0)   |           |                  | -                | -                 | 1051 (33.1)   | 6415<br>(31.3)   | 102 (31.6)     | 5366<br>(29.5)   | 2494 (25)       | 27537<br>(11.6)  | 2494<br>(25.7)  | 27537<br>(13.7)  |
| Yes, currently                          | 73 (6.6)       | 2892<br>(9.7)     | 269 (12.7)     | 1143<br>(14.5) | 158 (13.8) | 3041<br>(14.9)   | 32 (29.1) | 1922<br>(19.3)   | 129 (6.5)        | 9697<br>(7.4)     | 518 (16.3)    | 3360<br>(16.4)   | 19 (5.9)       | 1298<br>(7.1)    | 1198 (12)       | 23353<br>(9.8)   | 1198<br>(12.3)  | 23353<br>(11.6)  |
| Missing                                 | —              | —                 | —              | —              | —          | —                | 31 (28.2) | 5095<br>(51.2)   | 223 (11.2)       | 30 212<br>(23.2)  | —             | —                | 15 (4.6)       | 774<br>(4.3)     | 269 (2.7)       | 36081<br>(15.2)  |                 |                  |
| <b>History of psychiatric disorders</b> |                |                   |                |                |            |                  |           |                  |                  |                   |               |                  |                |                  |                 |                  |                 |                  |
| Yes                                     | 211<br>(19.0)* | 7059<br>(23.7)*   | 1094<br>(51.6) | 3789<br>(48.2) | 287 (25.1) | 5927<br>(29.0)   | 17 (15.5) | 1702<br>(17.1)*2 | 336 (16.8)       | 20 465<br>(15.7)  | 1056 (33.3)   | 6700<br>(32.6)   | 109 (33.7)     | 5917<br>(32.5)   | 3110<br>(31.2)  | 51559<br>(21.7)  | 3110<br>(31.5)  | 51559<br>(22.2)  |
| No                                      | 900<br>(81.0)* | 22 747<br>(76.3)* | 1027<br>(48.4) | 4079<br>(51.8) | 857 (74.9) | 14 544<br>(71.0) | 93 (84.5) | 8249<br>(82.9)   | 1581<br>(79.2)   | 105 084<br>(80.6) | 2104 (66.3)   | 13 618<br>(66.4) | 210 (650)      | 11 879<br>(65.3) | 6772<br>(67.9)  | 180200<br>(75.9) | 6772<br>(68.5)  | 180200<br>(77.8) |
| Missing                                 | —              | —                 | —              | —              | —          | —                |           |                  | 78 (3.9)         | 4907<br>(3.8)     | 15 (0.5)      | 205<br>(1.0)     | 4 (1.2)        | 399<br>(2.2)     | 97 (1)          | 5511<br>(2.3)    |                 |                  |
| <b>Chronic medical conditions</b>       |                |                   |                |                |            |                  |           |                  |                  |                   |               |                  |                |                  |                 |                  |                 |                  |
| No condition                            | 500<br>(45.0)  | 10 151<br>(34.1)  | 1284<br>(60.5) | 4359<br>(55.4) | 785 (68.6) | 12 021<br>(58.7) | -         | -                | 1541<br>(77.2)   | 101 521<br>(77.8) | 2288 (72.1)   | 13 899<br>(67.7) | 169 (52.3)     | 9658<br>(53.1)   | 6567<br>(65.8)  | 151609<br>(63.9) | 6567<br>(67.2)  | 151609<br>(69)   |
| 1 condition                             | 357<br>(32.1)  | 9652<br>(32.4)    | 604 (28.5)     | 2565<br>(32.6) | 274 (24.0) | 5968<br>(29.2)   | -         | -                | 311 (15.6)       | 19 014<br>(14.6)  | 684 (21.5)    | 4867<br>(23.7)   | 104 (32.2)     | 5128<br>(28.2)   | 2334<br>(23.4)  | 47194<br>(19.9)  | 2334<br>(23.9)  | 47194<br>(21.5)  |
| 2 conditions                            | 188<br>(16.9)  | 5820<br>(19.5)    | 171 (8.1)      | 653<br>(8.3)   | 60 (5.2)   | 1908<br>(9.3)    | -         | -                | 43 (2.2)         | 2364<br>(1.8)     | 161 (5.1)     | 1303<br>(6.3)    | 30 (9.3)       | 2042<br>(11.2)   | 653 (6.5)       | 14090<br>(5.9)   | 653 (6.7)       | 14090<br>(6.4)   |
| > 2 conditions                          | 66 (5.9)       | 4183<br>(14.0)    | 62.0 (2.9)     | 291<br>(3.7)   | 25 (2.2)   | 574<br>(2.8)     | -         | -                | 9 (0.5)          | 360<br>(0.3)      | 42 (1.3)      | 454<br>(2.2)     | 16 (5.0)       | 1040<br>(5.7)    | 220 (2.2)       | 6902<br>(2.9)    | 220 (2.3)       | 6902<br>(3.1)    |
| Missing                                 | —              | —                 | —              | —              | —          | —                | -         | -                | 91 (4.6)         | 7197<br>(5.5)     | —             | —                | 4 (1.2)        | 327<br>(1.8)     | 205 (2.1)       | 17475<br>(7.4)   |                 |                  |
| <b>Response periods</b>                 |                |                   |                |                |            |                  |           |                  |                  |                   |               |                  |                |                  |                 |                  |                 |                  |

|                             |               |                  |                |                |                |                  |             |               |                |                  |               |                |            |                 |                |                  |                |                  |
|-----------------------------|---------------|------------------|----------------|----------------|----------------|------------------|-------------|---------------|----------------|------------------|---------------|----------------|------------|-----------------|----------------|------------------|----------------|------------------|
| April-June 2020             | 125<br>(11.3) | 52 (0.2)         | 138 (6.5)      | 1113<br>(14.1) | 372 (32.5)     | 19 807<br>(96.8) | 14 (12.7)*3 | 9951<br>(100) | 346 (17.3)     | 130 456<br>(100) | 45 (1.4)      | 317<br>(1.5)   | 70 (21.7)  | 18 195<br>(100) | 1110<br>(11.1) | 179891<br>(75.8) | 1110<br>(11.1) | 179891<br>(75.8) |
| July-September 2020         | —             | —                | 155 (7.3)      | 1133<br>(14.4) | 9 (0.8)        | 232<br>(1.1)     | 3 (2.7)     | -             | 292 (14.6)     | -                | 1322 (41.6)   | 9262<br>(45.1) | 20 (6.2)   | —               | 1801 (18)      | 10627<br>(4.5)   | 1801 (18)      | 10627<br>(4.5)   |
| October-December 2020       | 947<br>(85.2) | 29 049<br>(97.5) | 166 (7.8)      | 1328<br>(16.9) | 139 (12.2)     | 396<br>(1.9)     | 26 (23.6)   | -             | 682 (34.2)     | -                | 1368 (43.1)   | 8819<br>(43.0) | —          | —               | 3328<br>(33.4) | 39592<br>(16.7)  | 3328<br>(33.4) | 39592<br>(16.7)  |
| January-March 2021          | 39 (3.5)      | 705<br>(2.4)     | 905 (42.7)     | 2499<br>(31.8) | 574 (50.2)     | 32 (0.2)         | 28 (25.5)   | -             | 86 (4.3)       | -                | 319<br>(10.0) | 1524<br>(7.4)  | 233 (72.1) | —               | 2184<br>(21.9) | 4760 (2)         | 2184<br>(21.9) | 4760 (2)         |
| April-June 2021             | —             | —                | 757 (35.7)     | 1795<br>(22.8) | 50 (4.4)       | 4 (0.0)          | 39 (35.5)   | -             | 589 (29.5)     | -                | 121 (3.8)     | 601<br>(2.9)   | —          | —               | 1556<br>(15.6) | 2400 (1)         | 1556<br>(15.6) | 2400 (1)         |
| <b>Illness severity</b>     |               |                  |                |                |                |                  |             |               |                |                  |               |                |            |                 |                |                  |                |                  |
| Never bedridden             | 560<br>(50.4) | —                | 1061<br>(50.0) | —              | 428 (37.4)     | —                | -           | -             | 636 (31.9)     | —                | 475 (15.0)    | —              | —          | —               | 3160<br>(31.7) | —                | 3160<br>(31.7) | —                |
| Bedridden 1-6 days          | 551<br>(49.6) | —                | 773 (36.4)     | —              | 455 (39.8)     | —                | -           | -             | 213 (10.7)     | —                | 461 (14.5)    | —              | —          | —               | 2453<br>(24.6) | —                | 2453<br>(33.9) | —                |
| Bedridden 7 days or more    | —             | —                | 287 (13.5)     | —              | 261 (22.8)     | —                | -           | -             | 685 (34.3)     | —                | 380 (12.0)    | —              | —          | —               | 1613<br>(16.2) | —                | 1613<br>(22.3) | —                |
| Missing                     | —             | —                | —              | —              | —              | —                | -           | -             | 461 (23.1)     | —                | 1859 (58.6)   | —              | —          | —               | 2753<br>(27.6) | —                | —              | —                |
| Non-Hospitalized            | —             | —                | 2073<br>(97.7) | —              | 1056<br>(92.3) | —                | -           | -             | 1495<br>(74.9) | —                | 3090 (97.3)   | —              | 286 (88.5) | —               | 8000<br>(80.2) | —                | 8000<br>(96.4) | —                |
| Hospitalized                | —             | —                | 48 (2.3)       | —              | 88 (7.7)       | —                | -           | -             | 39 (2.0)       | —                | 85 (0.3)      | —              | 37 (11.4)  | —               | 297 (3)        | —                | 297 (3.6)      | —                |
| Missing                     | —             | —                | —              | —              | —              | —                | -           | -             | 461 (23.1)     | —                | —             | —              | —          | —               | 1682<br>(16.9) | —                | —              | —                |
| <b>Time since diagnosis</b> |               |                  |                |                |                |                  |             |               |                | (at wave 28)     |               |                |            |                 |                |                  |                | —                |
| 0-2 months                  | 594<br>(53.5) | —                | 1055<br>(49.7) | —              | 444 (38.8)     | —                | 17 (15.5)   | -             | 568 (28.5)     | —                | 215 (6.8)     | —              | 215 (66.6) | —               | 3108<br>(31.1) | —                | 3108<br>(31.1) | —                |
| 2-6 months                  | 373<br>(33.6) | —                | 954 (45.0)     | —              | 541 (47.3)     | —                | 43 (39.1)   | -             | 951 (47.7)     | —                | 682<br>(21.5) | —              | 98 (30.3)  | —               | 3642<br>(36.5) | —                | 3642<br>(36.5) | —                |
| 6-16 months                 | 144<br>(13.0) | —                | 112 (5.3)      | —              | 159 (13.9)     | —                | 50 (45.5)   | -             | 476 (23.9)     | —                | 2278 (71.7)   | —              | 10 (3.1)   | —               | 3229<br>(32.4) | —                | 3229<br>(32.4) | —                |
| Missing                     | —             | —                | —              | —              | —              | —                | -           | -             | —              | —                | —             | —              | —          | —               | 0 (0)          | —                | —              | —                |

\* Information obtained from registers

\*\* Response option not offered to participants

\*\*\*Data only collected in long follow-ups, hence missing data independent of hospitalisation. Participants who got diagnosed at the other eight follow-ups have not answered this question

## MAP-19

\*1 This number include higher education in Norway, encompassing both Bachelor, Master and PhD.

\*2 We ask about a current psychological disorder

\*3 do you want the number of COVID-19 infected at that timepoint or whether they filled out the questionnaires? Currently it is those who filled out the questionnaires at the different timepoints

**Table S3: Overview of total number of COVID-19 cases per country and proportion of population diagnosed with COVID-19<sup>1</sup>**

| <b>Cohort</b>  | <b>Location</b> | <b>End of study</b> | <b>Total cases at end of study<sup>a</sup></b> | <b>Population of country</b> | <b>Proportion of population with confirmed COVID-19 diagnosis</b> |
|----------------|-----------------|---------------------|------------------------------------------------|------------------------------|-------------------------------------------------------------------|
| DBDS           | Denmark         | August 2021         | 347 028                                        | 5 813 302                    | 6·0%                                                              |
| EstBB-C19      | Estonia         | August 2021         | 141 956                                        | 1 325 188                    | 10·7%                                                             |
| C19-Resilience | Iceland         | August 2021         | 10 789                                         | 343 360                      | 3·1%                                                              |
| MAP-19         | Norway          | August 2021         | 160 174                                        | 5 465 629                    | 2·9%                                                              |
| MoBa           | Norway          | May 2021            | 125 116                                        | 5 465 629                    | 2·3%                                                              |
| Omtanke2020    | Sweden          | June 2021           | 1 089 990                                      | 10 160 159                   | 10·7%                                                             |
| CovidLife      | United Kingdom  | February 2021       | 4 188 827                                      | 68 207 114                   | 6·1%                                                              |

<sup>a</sup>Number of cases on the last day of the month

Table S4: Prevalence and prevalence ratios of mental health indicators among individuals with and without a diagnosis of COVID-19, overall and in subgroup analyses by illness severity and time from diagnosis for each cohort. Combined prevalence for each mental health indicator included as well.

|                                                |           | <b>DBDS (DK)</b>           |                     |                                |     |                            |                     |                                |     |                            |                     |                                |     |                            |                     |                                |  |
|------------------------------------------------|-----------|----------------------------|---------------------|--------------------------------|-----|----------------------------|---------------------|--------------------------------|-----|----------------------------|---------------------|--------------------------------|-----|----------------------------|---------------------|--------------------------------|--|
|                                                |           | N=30 917                   |                     |                                |     |                            |                     |                                |     |                            |                     |                                |     |                            |                     |                                |  |
|                                                |           | Overall                    |                     |                                |     | Diagnosed 0-2 months ago   |                     |                                |     | Diagnosed 2-6 months ago   |                     |                                |     | Diagnosed 6-16 months ago  |                     |                                |  |
|                                                | n         | n <sub>threshold</sub> (%) | PR (age+gender adj) | PR (multivar adj) <sup>a</sup> | n   | n <sub>threshold</sub> (%) | PR (age+gender adj) | PR (multivar adj) <sup>a</sup> | n   | n <sub>threshold</sub> (%) | PR (age+gender adj) | PR (multivar adj) <sup>a</sup> | n   | n <sub>threshold</sub> (%) | PR (age+gender adj) | PR (multivar adj) <sup>a</sup> |  |
| <b>Depression (PHQ-9 / EST-Q2)</b>             |           |                            |                     |                                |     |                            |                     |                                |     |                            |                     |                                |     |                            |                     |                                |  |
| No confirmed diagnosis                         | 29<br>802 | 2232 (7.5)                 | Ref.                | Ref.                           | -   | -                          | -                   | -                              | -   | -                          | -                   | -                              | -   | -                          | -                   | -                              |  |
| Ever diagnosed with COVID-19                   | 1111      | 136 (12.2)                 | 1.33 (1.13-1.56)    | 1.45 (1.23-1.71)               | 594 | 80 (13.5)                  | 1.49 (1.22-1.83)    | 1.64 (1.33-2.03)               | 373 | 41 (11.0)                  | 1.20 (0.90-1.59)    | 1.28 (0.95-1.73)               | 144 | 15 (10.4)                  | 1.06 (0.66-1.70)    | 1.05 (0.65-1.70)               |  |
| Never bedridden                                | 560       | 42 (7.5)                   | 0.81 (0.61-1.09)    | 0.90 (0.67-1.22)               | 311 | 27 (8.7)                   | 0.97 (0.68-1.38)    | 1.09 (0.76-1.56)               | 189 | 10 (5.3)                   | 0.57 (0.31-1.04)    | 0.63 (0.34-1.17)               | 60  | 5 (8.3)                    | 0.79 (0.34-1.83)    | 0.82 (0.34-1.96)               |  |
| Bedridden 1-6 days                             | 551       | 94 (17.1)                  | 1.85 (1.55-2.24)    | 1.97 (1.63-2.40)               | 283 | 53 (18.7)                  | 2.05 (1.61-2.62)    | 2.22 (1.72-2.87)               | 184 | 31 (16.8)                  | 1.85 (1.35-2.52)    | 1.93 (1.38-2.67)               | 84  | 10 (11.9)                  | 1.26 (0.71-2.24)    | 1.22 (0.69-2.16)               |  |
| Bedridden 7 days or more                       | -         | -                          | -                   | -                              | -   | -                          | -                   | -                              | -   | -                          | -                   | -                              | -   | -                          | -                   | -                              |  |
| Non-Hospitalized                               | -         | -                          | -                   | -                              | -   | -                          | -                   | -                              | -   | -                          | -                   | -                              | -   | -                          | -                   | -                              |  |
| Hospitalized                                   | -         | -                          | -                   | -                              | -   | -                          | -                   | -                              | -   | -                          | -                   | -                              | -   | -                          | -                   | -                              |  |
| <b>Anxiety symptoms (GAD-7 / ASS / EST-Q2)</b> |           |                            |                     |                                |     |                            |                     |                                |     |                            |                     |                                |     |                            |                     |                                |  |
| No confirmed diagnosis                         | 29<br>806 | 909 (3.0)                  | Ref.                | Ref.                           | -   | -                          | -                   | -                              | -   | -                          | -                   | -                              | -   | -                          | -                   | -                              |  |
| Ever diagnosed with COVID-19                   | 1111      | 39 (3.5)                   | 0.95 (0.96-1.30)    | 0.91 (0.66-1.26)               | 594 | 23 (3.9)                   | 1.04 (0.70-1.57)    | 1.02 (0.68-1.54)               | 373 | 12 (3.2)                   | 0.89 (0.51-1.55)    | 0.82 (0.46-1.47)               | 144 | <5                         | -                   | -                              |  |
| Never bedridden                                | 560       | 12 (2.1)                   | 0.57 (0.32-1.00)    | 0.55 (0.31-0.98)               | 311 | 8 (2.6)                    | 0.69 (0.34-1.36)    | 0.68 (0.34-1.36)               | 189 | <5                         | —                   | —                              | 60  | <5                         | -                   | -                              |  |
| Bedridden 1-6 days                             | 551       | 27 (4.9)                   | 1.35 (0.93-1.96)    | 1.29 (0.88-1.88)               | 283 | 15 (5.3)                   | 1.45 (0.88-2.38)    | 1.40 (0.85-2.30)               | 184 | 9 (4.9)                    | 1.40 (0.73-2.65)    | 1.27 (0.66-2.46)               | 84  | <5                         | -                   | -                              |  |





|                                                |      | <b>EstBB C-19 (EE)</b>     |                     |                                |                          |                            |                     |                                |                          |                            |                     |                                |                           |                            |                     |                                |
|------------------------------------------------|------|----------------------------|---------------------|--------------------------------|--------------------------|----------------------------|---------------------|--------------------------------|--------------------------|----------------------------|---------------------|--------------------------------|---------------------------|----------------------------|---------------------|--------------------------------|
|                                                |      | N=9989                     |                     |                                |                          |                            |                     |                                |                          |                            |                     |                                |                           |                            |                     |                                |
|                                                |      | Overall                    |                     |                                | Diagnosed 0-2 months ago |                            |                     |                                | Diagnosed 2-6 months ago |                            |                     |                                | Diagnosed 6-16 months ago |                            |                     |                                |
|                                                | n    | n <sub>threshold</sub> (%) | PR (age+gender adj) | PR (multivar adj) <sup>a</sup> | n                        | n <sub>threshold</sub> (%) | PR (age+gender adj) | PR (multivar adj) <sup>a</sup> | n                        | n <sub>threshold</sub> (%) | PR (age+gender adj) | PR (multivar adj) <sup>a</sup> | n                         | n <sub>threshold</sub> (%) | PR (age+gender adj) | PR (multivar adj) <sup>a</sup> |
| <b>Depression (PHQ-9 / EST-Q2)</b>             |      |                            |                     |                                |                          |                            |                     |                                |                          |                            |                     |                                |                           |                            |                     |                                |
| No confirmed diagnosis                         | 7868 | 1640 (20.8)                | Ref.                | Ref.                           | -                        | -                          | -                   | -                              | -                        | -                          | -                   | -                              | -                         | -                          | -                   | -                              |
| Ever diagnosed with COVID-19                   | 2121 | 402 (19.0)                 | 0.92 (0.84-1.02)    | 0.91 (0.83-1.00)               | 1055                     | 211 (20.0)                 | 0.96 (0.85-1.09)    | 0.92 (0.82-1.04)               | 954                      | 171 (17.9)                 | 0.87 (0.76-1.01)    | 0.89 (0.77-1.03)               | 112                       | 20 (17.9)                  | 0.92 (0.63-1.35)    | 0.90 (0.61-1.33)               |
| Never bedridden                                | 1061 | 174 (16.4)                 | 0.80 (0.70-0.92)    | 0.80 (0.70-0.92)               | 513                      | 88 (17.2)                  | 0.83 (0.68-1.00)    | 0.82 (0.69-0.99)               | 484                      | 75 (15.5)                  | 0.76 (0.62-0.94)    | 0.76 (0.62-0.94)               | 64                        | 11 (17.2)                  | 0.94 (0.57-1.55)    | 0.88 (0.53-1.46)               |
| Bedridden 1-6 days                             | 773  | 163 (21.1)                 | 0.99 (0.86-1.14)    | 0.96 (0.84-1.11)               | 403                      | 91 (22.6)                  | 1.05 (0.88-1.25)    | 0.96 (0.81-1.15)               | 339                      | 66 (19.5)                  | 0.93 (0.74-1.15)    | 0.96 (0.77-1.20)               | 31                        | 6 (22.9)                   | 0.92 (0.45-1.88)    | 0.90 (0.44-1.85)               |
| Bedridden 7 days or more                       | 287  | 65 (22.6)                  | 1.20 (0.97-1.49)    | 1.19 (0.97-1.48)               | 139                      | 32 (23.0)                  | 1.27 (0.95-1.70)    | 1.19 (0.89-1.60)               | 131                      | 30 (22.9)                  | 1.17 (0.85-1.61)    | 1.22 (0.89-1.66)               | 17                        | 3 (17.6)                   | 0.86 (0.33-2.22)    | 0.98 (0.34-2.80)               |
| Non-Hospitalized                               | 2073 | 396 (19.1)                 | 0.93 (0.84-1.02)    | 0.92 (0.83-1.01)               | 1040                     | 209 (20.1)                 | 0.97 (0.85-1.09)    | 0.92 (0.82-1.04)               | 931                      | 168 (18.0)                 | 0.88 (0.76-1.01)    | 0.90 (0.78-1.04)               | 102                       | 19 (18.6)                  | 0.95 (0.64-1.40)    | 0.92 (0.61-1.36)               |
| Hospitalized                                   | 35   | 5 (14.3)                   | 0.82 (0.38-1.78)    | 0.80 (0.36-1.79)               | 12                       | 2 (16.7)                   | 0.99 (0.28-3.46)    | 1.08 (0.28-4.08)               | 16                       | 2 (12.5)                   | 0.73 (0.21-2.56)    | 0.62 (0.18-2.07)               | 7                         | 1 (16.7)                   | 0.72 (0.14-3.65)    | 0.87 (0.14-5.32)               |
| <b>Anxiety symptoms (GAD-7 / ASS / EST-Q2)</b> |      |                            |                     |                                |                          |                            |                     |                                |                          |                            |                     |                                |                           |                            |                     |                                |
| No confirmed diagnosis                         | 7868 | 1540 (19.6)                | Ref.                | Ref.                           | -                        | -                          | -                   | -                              | -                        | -                          | -                   | -                              | -                         | -                          | -                   | -                              |
| Ever diagnosed with COVID-19                   | 2121 | 379 (17.9)                 | 0.93 (0.85-1.03)    | 0.97 (0.87-1.07)               | 1055                     | 193 (18.3)                 | 0.95 (0.84-1.09)    | 0.96 (0.84-1.09)               | 954                      | 164 (17.2)                 | 0.90 (0.78-1.03)    | 0.96 (0.83-1.11)               | 112                       | 22 (19.6)                  | 1.08 (0.75-1.57)    | 1.05 (0.72-1.53)               |
| Never bedridden                                | 1061 | 174 (16.4)                 | 0.86 (0.75-0.99)    | 0.89 (0.78-1.02)               | 513                      | 89 (17.3)                  | 0.90 (0.75-1.09)    | 0.94 (0.78-1.12)               | 484                      | 72 (14.9)                  | 0.78 (0.63-0.97)    | 0.81 (0.66-1.01)               | 64                        | 13 (20.3)                  | 1.18 (0.74-1.90)    | 1.10 (0.67-1.80)               |
| Bedridden 1-6 days                             | 773  | 144 (18.6)                 | 0.94 (0.81-1.09)    | 0.97 (0.83-1.12)               | 403                      | 83 (20.6)                  | 1.03 (0.85-1.25)    | 1.00 (0.83-1.21)               | 339                      | 57 (16.8)                  | 0.86 (0.68-1.08)    | 0.95 (0.75-1.20)               | 31                        | 4 (12.9)                   | 0.66 (0.27-1.63)    | 0.63 (0.26-1.56)               |

|                                                               |      |             |                  |                  |      |            |                  |                  |     |            |                  |                  |     |           |                  |                  |
|---------------------------------------------------------------|------|-------------|------------------|------------------|------|------------|------------------|------------------|-----|------------|------------------|------------------|-----|-----------|------------------|------------------|
| Bedridden 7 days or more                                      | 287  | 61 (21.3)   | 1.20 (0.96-1.50) | 1.27 (1.01-1.59) | 139  | 21 (15.1)  | 0.89 (0.61-1.31) | 0.92 (0.62-1.37) | 131 | 35 (26.7)  | 1.44 (1.08-1.92) | 1.56 (1.18-2.08) | 17  | 5 (29.4)  | 1.54 (0.77-3.09) | 1.80 (0.95-3.38) |
| Non-Hospitalized                                              | 2073 | 372 (17.9)  | 0.93 (0.85-1.03) | 0.97 (0.87-1.07) | 1040 | 192 (18.5) | 0.96 (0.84-1.09) | 0.97 (0.85-1.10) | 931 | 160 (17.2) | 0.89 (0.77-1.03) | 0.96 (0.83-1.11) | 102 | 20 (19.6) | 1.07 (0.73-1.58) | 1.03 (0.69-1.53) |
| Hospitalized                                                  | 35   | 3 (8.6)     | 0.52 (0.18-1.49) | 0.53 (0.18-1.54) | 12   | 1 (8.3)    | 0.51 (0.08-3.36) | 0.58 (0.08-3.99) | 16  | 1 (6.2)    | 0.39 (0.06-2.59) | 0.35 (0.06-2.20) | 7   | 1 (14.3)  | 0.77 (0.15-3.94) | 0.86 (0.15-5.07) |
| <b>COVID-19 related distress symptoms (PC-PTSD-5 / PCL-5)</b> |      |             |                  |                  |      |            |                  |                  |     |            |                  |                  |     |           |                  |                  |
| No confirmed diagnosis                                        | -    | -           | -                | -                | -    | -          | -                | -                | -   | -          | -                | -                | -   | -         | -                | -                |
| Ever diagnosed with COVID-19                                  | -    | -           | -                | -                | -    | -          | -                | -                | -   | -          | -                | -                | -   | -         | -                | -                |
| Never bedridden                                               | -    | -           | -                | -                | -    | -          | -                | -                | -   | -          | -                | -                | -   | -         | -                | -                |
| Bedridden 1-6 days                                            | -    | -           | -                | -                | -    | -          | -                | -                | -   | -          | -                | -                | -   | -         | -                | -                |
| Bedridden 7 days or more                                      | -    | -           | -                | -                | -    | -          | -                | -                | -   | -          | -                | -                | -   | -         | -                | -                |
| Non-Hospitalized                                              | -    | -           | -                | -                | -    | -          | -                | -                | -   | -          | -                | -                | -   | -         | -                | -                |
| Hospitalized                                                  | -    | -           | -                | -                | -    | -          | -                | -                | -   | -          | -                | -                | -   | -         | -                | -                |
| <b>Sleep quality (PSQI, EST-Q2, Single-item measures)</b>     |      |             |                  |                  |      |            |                  |                  |     |            |                  |                  |     |           |                  |                  |
| No confirmed diagnosis                                        | 7868 | 2406 (30.6) | Ref.             | Ref.             | -    | -          | -                | -                | -   | -          | -                | -                | -   | -         | -                | -                |
| Ever diagnosed with COVID-19                                  | 2121 | 642 (30.3)  | 1.01 (0.94-1.08) | 1.03 (0.96-1.11) | 1055 | 304 (28.8) | 0.97 (0.88-1.08) | 0.98 (0.89-1.09) | 954 | 295 (30.9) | 1.02 (0.92-1.12) | 1.07 (0.97-1.18) | 112 | 43 (38.4) | 1.26 (0.99-1.60) | 1.19 (0.94-1.52) |
| Never bedridden                                               | 1061 | 319 (30.1)  | 1.00 (0.91-1.10) | 1.02 (0.93-1.12) | 513  | 142 (27.7) | 0.94 (0.81-1.08) | 0.96 (0.84-1.10) | 484 | 151 (31.2) | 1.03 (0.90-1.17) | 1.05 (0.92-1.20) | 64  | 26 (40.6) | 1.30 (0.96-1.76) | 1.24 (0.91-1.70) |
| Bedridden 1-6 days                                            | 773  | 223 (28.8)  | 0.98 (0.87-1.09) | 0.99 (0.88-1.11) | 403  | 117 (29.0) | 0.99 (0.85-1.16) | 0.97 (0.83-1.14) | 339 | 94 (27.7)  | 0.93 (0.78-1.10) | 0.99 (0.83-1.18) | 31  | 12 (38.7) | 1.31 (0.85-2.03) | 1.17 (0.75-1.82) |
| Bedridden 7 days or more                                      | 287  | 100 (34.8)  | 1.13 (0.96-1.32) | 1.19 (1.01-1.39) | 139  | 45 (32.4)  | 1.06 (0.83-1.35) | 1.10 (0.86-1.41) | 131 | 50 (38.2)  | 1.21 (0.97-1.49) | 1.30 (1.06-1.60) | 17  | 5 (29.4)  | 1.01 (0.48-2.11) | 1.04 (0.51-2.10) |



|                                                               |           |                |                  |                  |     |            |                  |                  |     |            |                  |                  |     |          |                  |                  |
|---------------------------------------------------------------|-----------|----------------|------------------|------------------|-----|------------|------------------|------------------|-----|------------|------------------|------------------|-----|----------|------------------|------------------|
| Ever diagnosed with COVID-19                                  | 1144      | 132 (11.5)     | 0.80 (0.68-0.94) | 1.01 (0.81-1.26) | 444 | 66 (14.9)  | 1.05 (0.84-1.31) | 1.13 (0.90-1.42) | 541 | 62 (11.5)  | 0.75 (0.59-0.94) | 0.77 (0.51-1.15) | 159 | 4 (2.5)  | 0.20 (0.08-0.53) | 0.21 (0.07-0.65) |
| Never bedridden                                               | 428       | 31 (7.2)       | 0.46 (0.33-0.65) | 0.64 (0.43-0.94) | 159 | 18 (11.3)  | 0.72 (0.47-1.11) | 0.89 (0.58-1.36) | 206 | 13 (6.3)   | 0.39 (0.23-0.65) | 0.44 (0.23-0.86) | 63  | 0 (0)    | -                | -                |
| Bedridden 1-6 days                                            | 455       | 60 (13.2)      | 0.89 (0.71-1.12) | 1.02 (0.78-1.34) | 165 | 22 (13.3)  | 0.94 (0.65-1.38) | 0.86 (0.59-1.25) | 236 | 36 (15.3)  | 0.99 (0.74-1.32) | 0.95 (0.60-1.50) | 54  | 2 (3.7)  | 0.27 (0.07-1.04) | 0.38 (0.09-1.52) |
| Bedridden 7 days or more                                      | 261       | 41 (15.7)      | 1.31 (1.00-1.72) | 1.57 (1.17-2.12) | 120 | 26 (21.7)  | 1.76 (1.26-2.46) | 1.99 (1.43-2.76) | 99  | 13 (13.1)  | 1.02 (0.63-1.64) | 0.99 (0.57-1.73) | 42  | 2 (4.8)  | 0.54 (0.15-1.92) | 0.40 (0.11-1.55) |
| Non-Hospitalized                                              | 1056      | 121 (11.5)     | 0.77 (0.65-0.91) | 0.97 (0.77-1.22) | 407 | 59 (14.5)  | 0.99 (0.78-1.26) | 1.08 (0.85-1.38) | 505 | 58 (11.5)  | 0.73 (0.57-0.92) | 0.73 (0.48-1.12) | 144 | 4 (2.8)  | 0.21 (0.08-0.55) | 0.23 (0.07-0.69) |
| Hospitalized                                                  | 61        | 10 (16.4)      | 1.81 (1.10-2.96) | 1.82 (1.07-3.10) | 22  | 6 (27.3)   | 2.45 (1.50-4.02) | 1.93 (1.08-3.45) | 30  | 4 (13.3)   | 1.53 (0.62-3.80) | 1.57 (0.58-4.28) | 9   | 0 (0)    | -                | -                |
| <b>COVID-19 related distress symptoms (PC-PTSD-5 / PCL-5)</b> |           |                |                  |                  |     |            |                  |                  |     |            |                  |                  |     |          |                  |                  |
| No confirmed diagnosis                                        | 20<br>471 | 3902<br>(19.1) | Ref.             | Ref.             | -   | -          | -                | -                | -   | -          | -                | -                | -   | -        | -                | -                |
| Ever diagnosed with COVID-19                                  | 1144      | 223 (19.5)     | 0.93 (0.83-1.05) | 1.14 (0.97-1.35) | 444 | 108 (24.3) | 1.16 (0.98-1.36) | 1.23 (1.04-1.46) | 541 | 105 (19.4) | 0.9 (0.76-1.07)  | 0.86 (0.62-1.20) | 159 | 10 (6.3) | 0.34 (0.19-0.62) | 0.36 (0.16-0.82) |
| Never bedridden                                               | 428       | 49 (11.4)      | 0.53 (0.41-0.69) | 0.67 (0.50-0.90) | 159 | 27 (17.0)  | 0.79 (0.56-1.10) | 0.89 (0.63-1.25) | 206 | 20 (9.7)   | 0.44 (0.29-0.67) | 0.44 (0.26-0.72) | 63  | 2 (3.2)  | 0.16 (0.04-0.64) | 0.17 (0.04-0.73) |
| Bedridden 1-6 days                                            | 455       | 99 (21.8)      | 1.02 (0.85-1.21) | 1.20 (0.98-1.48) | 165 | 39 (23.6)  | 1.10 (0.84-1.45) | 1.11 (0.84-1.47) | 236 | 56 (23.7)  | 1.09 (0.87-1.36) | 1.01 (0.70-1.47) | 54  | 4 (7.4)  | 0.38 (0.15-0.97) | 0.47 (0.16-1.33) |
| Bedridden 7 days or more                                      | 261       | 75 (28.7)      | 1.51 (1.25-1.82) | 1.73 (1.40-2.14) | 120 | 42 (35.0)  | 1.77 (1.40-2.25) | 1.89 (1.48-2.41) | 99  | 29 (29.3)  | 1.49 (1.09-2.04) | 1.35 (0.90-2.04) | 42  | 4 (9.5)  | 0.61 (0.25-1.49) | 0.54 (0.17-1.73) |
| Non-Hospitalized                                              | 1056      | 199 (18.8)     | 0.88 (0.78-1.00) | 1.08 (0.91-1.28) | 407 | 96 (23.6)  | 1.10 (0.92-1.31) | 1.18 (0.99-1.42) | 505 | 94 (18.6)  | 0.85 (0.71-1.02) | 0.81 (0.58-1.13) | 144 | 9 (6.2)  | 0.32 (0.17-0.61) | 0.35 (0.16-0.78) |
| Hospitalized                                                  | 61        | 17 (27.9)      | 1.75 (1.17-2.60) | 1.92 (1.28-2.88) | 22  | 9 (40.9)   | 2.23 (1.40-3.57) | 2.09 (1.25-3.49) | 30  | 7 (23.3)   | 1.51 (0.77-2.96) | 1.43 (0.73-2.82) | 9   | 1 (11.1) | 0.94 (0.14-6.17) | 0.81 (0.10-6.72) |
| <b>Sleep quality (PSQI, EST-Q2, Single-item measures)</b>     |           |                |                  |                  |     |            |                  |                  |     |            |                  |                  |     |          |                  |                  |





|                              |   |   |   |   |   |   |   |   |   |   |   |   |   |   |   |   |   |
|------------------------------|---|---|---|---|---|---|---|---|---|---|---|---|---|---|---|---|---|
| Ever diagnosed with COVID-19 | - | - | - | - | - | - | - | - | - | - | - | - | - | - | - | - | - |
| Never bedridden              | - | - | - | - | - | - | - | - | - | - | - | - | - | - | - | - | - |
| Bedridden 1-6 days           | - | - | - | - | - | - | - | - | - | - | - | - | - | - | - | - | - |
| Bedridden 7 days or more     | - | - | - | - | - | - | - | - | - | - | - | - | - | - | - | - | - |
| Non-Hospitalized             | - | - | - | - | - | - | - | - | - | - | - | - | - | - | - | - | - |
| Hospitalized                 | - | - | - | - | - | - | - | - | - | - | - | - | - | - | - | - | - |

| <b>MoBa (NO)</b>                   |           |                            |                     |                                |                          |                            |                     |                                |                          |                            |                     |                                |                           |                            |                     |                                |   |
|------------------------------------|-----------|----------------------------|---------------------|--------------------------------|--------------------------|----------------------------|---------------------|--------------------------------|--------------------------|----------------------------|---------------------|--------------------------------|---------------------------|----------------------------|---------------------|--------------------------------|---|
| N=132 451                          |           |                            |                     |                                |                          |                            |                     |                                |                          |                            |                     |                                |                           |                            |                     |                                |   |
|                                    | Overall   |                            |                     |                                | Diagnosed 0-2 months ago |                            |                     |                                | Diagnosed 2-6 months ago |                            |                     |                                | Diagnosed 6-16 months ago |                            |                     |                                |   |
|                                    | n         | n <sub>threshold</sub> (%) | PR (age+gender adj) | PR (multivar adj) <sup>a</sup> | n                        | n <sub>threshold</sub> (%) | PR (age+gender adj) | PR (multivar adj) <sup>a</sup> | n                        | n <sub>threshold</sub> (%) | PR (age+gender adj) | PR (multivar adj) <sup>a</sup> | n                         | n <sub>threshold</sub> (%) | PR (age+gender adj) | PR (multivar adj) <sup>a</sup> |   |
| <b>Depression (PHQ-9 / EST-Q2)</b> |           |                            |                     |                                |                          |                            |                     |                                |                          |                            |                     |                                |                           |                            |                     |                                |   |
| No confirmed diagnosis             | 91<br>649 | 4463 (4.9)                 | Ref                 | Ref                            | -                        | -                          | -                   | -                              | -                        | -                          | -                   | -                              | -                         | -                          | -                   | -                              | - |
| Ever diagnosed with COVID-19       | 292       | 19 (6.5)                   | 1.40 (0.91-2.17)    | 1.46 (0.94-2.26)               | 23                       | 3 (13.0)                   | 2.61 (0.92-7.38)    | 1.99 (0.72-5.45)               | 251                      | 14 (5.6)                   | 1.21 (0.73-2.02)    | 1.29 (0.77-2.17)               | -                         | -                          | -                   | -                              | - |
| Never bedridden                    | 85        | 3 (3.5)                    | 0.77 (0.25-2.33)    | 0.84 (0.27-2.63)               | 8                        | 0 (0)                      | -                   | -                              | 77                       | 3 (3.9)                    | 0.85 (0.28-2.57)    | 0.96 (0.31-2.99)               | -                         | -                          | -                   | -                              | - |
| Bedridden 1-6 days                 | 18        | 0 (0)                      | -                   | -                              | 0                        | 0 (0)                      | -                   | -                              | 18                       | 0 (0)                      | -                   | -                              | -                         | -                          | -                   | -                              | - |
| Bedridden 7 days or more           | 115       | 9 (7.8)                    | 1.64 (0.88-3.06)    | 1.87 (0.99-3.51)               | 4                        | 1 (25.0)                   | 4.30 (0.78-23.59)   | 4.46 (0.77-25.73)              | 111                      | 8 (7.2)                    | 1.52 (0.78-2.96)    | 1.74 (0.89-3.41)               | -                         | -                          | -                   | -                              | - |
| Non-Hospitalized                   | 211       | 12 (5.7)                   | 1.21 (0.70-2.10)    | 1.35 (0.77-2.36)               | 12                       | 1 (8.3)                    | 1.65 (0.26-10.58)   | 1.51 (0.22-10.32)              | 199                      | 11 (5.5)                   | 1.18 (0.67-2.10)    | 1.34 (0.75-2.40)               | -                         | -                          | -                   | -                              | - |
| Hospitalized                       | 7         | 0 (0)                      | -                   | -                              | 0                        | 0 (0)                      | -                   | -                              | 7                        | 0 (0)                      | -                   | -                              | -                         | -                          | -                   | -                              | - |
| <b>Anxiety symptoms</b>            |           |                            |                     |                                |                          |                            |                     |                                |                          |                            |                     |                                |                           |                            |                     |                                |   |

| <b>(GAD-7 / ASS / EST-Q2)</b>                                 |           |                  |                  |                  |     |           |                   |                   |     |            |                  |                  |     |           |                  |                  |
|---------------------------------------------------------------|-----------|------------------|------------------|------------------|-----|-----------|-------------------|-------------------|-----|------------|------------------|------------------|-----|-----------|------------------|------------------|
| No confirmed diagnosis                                        | 98<br>195 | 2724 (2.8)       | Ref.             | Ref.             | -   | -         | -                 | -                 | -   | -          | -                | -                | -   | -         | -                | -                |
| Ever diagnosed with COVID-19                                  | 295       | 10 (3.4)         | 1.26 (0.68-2.31) | 1.26 (0.69-2.32) | 102 | 2 (2.0)   | 0.72 (0.18-2.87)  | 0.59 (0.15-2.28)  | 193 | 8 (4.1)    | 1.54 (0.78-3.03) | 1.77 (0.89-3.50) | -   | -         | -                | -                |
| Never bedridden                                               | 79        | 3 (3.8)          | 1.43 (0.47-4.34) | 1.64 (0.58-4.63) | 10  | 1 (10.0)  | 4.22 (0.66-26.99) | 4.02 (1.02-15.78) | 69  | 2 (2.9)    | 1.07 (0.27-4.21) | 1.27 (0.34-4.72) | -   | -         | -                | -                |
| Bedridden 1-6 days                                            | 19        | 0 (0)            | -                | -                | 2   | 0 (0)     | -                 | -                 | 17  | 0 (0)      | -                | -                | -   | -         | -                | -                |
| Bedridden 7 days or more                                      | 122       | 6 (4.9)          | 1.81 (0.83-3.94) | 2.07 (0.93-4.6)  | 15  | 0 (0)     | -                 | -                 | 107 | 6 (5.6)    | 2.08 (0.96-4.52) | 2.39 (1.08-5.32) | -   | -         | -                | -                |
| Non-Hospitalized                                              | 212       | 9 (4.2)          | 1.57 (0.83-2.98) | 1.78 (0.95-3.37) | 23  | 1 (4.3)   | 1.57 (0.23-10.77) | 1.67 (0.30-9.36)  | 189 | 8 (4.2)    | 1.57 (0.80-3.09) | 1.8 (0.91-3.57)  | -   | -         | -                | -                |
| Hospitalized                                                  | 8         | 0 (0.0)          | -                | -                | 4   | 0 (0)     | -                 | -                 | 4   | 0 (0)      | -                | -                | -   | -         | -                | -                |
| <b>COVID-19 related distress symptoms (PC-PTSD-5 / PCL-5)</b> |           |                  |                  |                  |     |           |                   |                   |     |            |                  |                  |     |           |                  |                  |
| No confirmed diagnosis                                        | -         | -                | -                | -                | -   | -         | -                 | -                 | -   | -          | -                | -                | -   | -         | -                | -                |
| Ever diagnosed with COVID-19                                  | -         | -                | -                | -                | -   | -         | -                 | -                 | -   | -          | -                | -                | -   | -         | -                | -                |
| Never bedridden                                               | -         | -                | -                | -                | -   | -         | -                 | -                 | -   | -          | -                | -                | -   | -         | -                | -                |
| Bedridden 1-6 days                                            | -         | -                | -                | -                | -   | -         | -                 | -                 | -   | -          | -                | -                | -   | -         | -                | -                |
| Bedridden 7 days or more                                      | -         | -                | -                | -                | -   | -         | -                 | -                 | -   | -          | -                | -                | -   | -         | -                | -                |
| Non-Hospitalized                                              | -         | -                | -                | -                | -   | -         | -                 | -                 | -   | -          | -                | -                | -   | -         | -                | -                |
| Hospitalized                                                  | -         | -                | -                | -                | -   | -         | -                 | -                 | -   | -          | -                | -                | -   | -         | -                | -                |
| <b>Sleep quality (PSQI, EST-Q2, Single-item measures)</b>     |           |                  |                  |                  |     |           |                   |                   |     |            |                  |                  |     |           |                  |                  |
| No confirmed diagnosis                                        | 77<br>044 | 16 062<br>(20.8) | Ref.             | Ref.             | -   | -         | -                 | -                 | -   | -          | -                | -                | -   | -         | -                | -                |
| Ever diagnosed with COVID-19                                  | 1061      | 289 (27.2)       | 1.32 (1.19-1.46) | 1.32 (1.20-1.46) | 205 | 49 (23.9) | 1.15 (0.90-1.47)  | 1.15 (0.90-1.47)  | 568 | 162 (28.5) | 1.38 (1.21-1.57) | 1.36 (1.20-1.55) | 288 | 78 (27.1) | 1.32 (1.09-1.60) | 1.35 (1.12-1.63) |



|                          |     |            |                  |                  |     |           |                  |                  |     |            |                  |                  |     |           |                  |                  |
|--------------------------|-----|------------|------------------|------------------|-----|-----------|------------------|------------------|-----|------------|------------------|------------------|-----|-----------|------------------|------------------|
| Never bedridden          | 398 | 80 (20.1)  | 0.98 (0.81-1.20) | 1.01 (0.83-1.23) | 62  | 12 (19.4) | 0.94 (0.57-1.56) | 0.94 (0.57-1.55) | 243 | 52 (21.4)  | 1.04 (0.82-1.33) | 1.07 (0.84-1.36) | 93  | 16 (17.2) | 0.86 (0.55-1.35) | 0.91 (0.58-1.43) |
| Bedridden 1-6 days       | 124 | 31 (25.0)  | 1.24 (0.92-1.68) | 1.24 (0.92-1.67) | 46  | 10 (21.7) | 1.07 (0.62-1.85) | 1.09 (0.64-1.87) | 61  | 18 (29.5)  | 1.46 (0.99-2.14) | 1.43 (0.98-2.08) | 17  | 3 (17.6)  | 0.91 (0.32-2.53) | 0.95 (0.36-2.48) |
| Bedridden 7 days or more | 410 | 145 (35.4) | 1.68 (1.47-1.91) | 1.64 (1.44-1.87) | 61  | 18 (29.5) | 1.38 (0.94-2.04) | 1.35 (0.91-2.00) | 215 | 80 (37.2)  | 1.75 (1.47-2.08) | 1.69 (1.42-2.01) | 134 | 47 (35.1) | 1.69 (1.34-2.12) | 1.70 (1.35-2.13) |
| Non-Hospitalized         | 912 | 249 (27.3) | 1.32 (1.18-1.47) | 1.32 (1.19-1.47) | 168 | 39 (23.2) | 1.12 (0.85-1.47) | 1.11 (0.85-1.46) | 510 | 149 (29.2) | 1.40 (1.22-1.61) | 1.40 (1.22-1.60) | 234 | 61 (26.1) | 1.27 (1.03-1.58) | 1.32 (1.06-1.63) |
| Hospitalized             | 20  | 7 (35.0)   | 1.85 (1.03-3.30) | 1.71 (0.95-3.07) | 1   | 1 (100.0) | 5.98 (5.83-6.14) | 6.33 (6.01-6.67) | 9   | 1 (11.1)   | 0.60 (0.10-3.63) | 0.58 (0.10-3.36) | 10  | 5 (50.0)  | 2.54 (1.38-4.66) | 2.25 (1.17-4.3)  |

| <b>Omtanke (SE)</b>                |         |                            |                     |                                |                          |                            |                     |                                |                          |                            |                     |                                |                           |                            |                     |                                |
|------------------------------------|---------|----------------------------|---------------------|--------------------------------|--------------------------|----------------------------|---------------------|--------------------------------|--------------------------|----------------------------|---------------------|--------------------------------|---------------------------|----------------------------|---------------------|--------------------------------|
| N=23 698                           |         |                            |                     |                                |                          |                            |                     |                                |                          |                            |                     |                                |                           |                            |                     |                                |
|                                    | Overall |                            |                     |                                | Diagnosed 0-2 months ago |                            |                     |                                | Diagnosed 2-6 months ago |                            |                     |                                | Diagnosed 6-16 months ago |                            |                     |                                |
|                                    | n       | n <sub>threshold</sub> (%) | PR (age+gender adj) | PR (multivar adj) <sup>a</sup> | n                        | n <sub>threshold</sub> (%) | PR (age+gender adj) | PR (multivar adj) <sup>a</sup> | n                        | n <sub>threshold</sub> (%) | PR (age+gender adj) | PR (multivar adj) <sup>a</sup> | n                         | n <sub>threshold</sub> (%) | PR (age+gender adj) | PR (multivar adj) <sup>a</sup> |
| <b>Depression (PHQ-9 / EST-Q2)</b> |         |                            |                     |                                |                          |                            |                     |                                |                          |                            |                     |                                |                           |                            |                     |                                |
| No confirmed diagnosis             | 20010   | 3702 (18,5)                | Ref.                | Ref.                           | -                        | -                          | -                   | -                              | -                        | -                          | -                   | -                              | -                         | -                          | -                   | -                              |
| Ever diagnosed with COVID-19       | 3060    | 706 (23.1)                 | 1.16 (1.09 - 1.25)  | 1.18 (1.10 - 1.27)             | 209                      | 48 (23.0)                  | 1.42 (1.07 - 1.89)  | 1.42 (1.00 - 2.02)             | 933                      | 219 (23.5)                 | 1.10 (0.97 - 1.24)  | 1.09 (0.97 - 1.23)             | 1918                      | 439 (22.9)                 | 1.17 (1.07 - 1.28)  | 1.26 (1.15 - 1.38)             |
| Never bedridden                    | 451     | 77 (17,1)                  | 0.80 (0.65 - 0.98)  | 0.90 (0.74 - 1.09)             | 10                       | 2 (20.0)                   | 1.17 (0.32 - 4.28)  | 0.87 (0.24 - 3.13)             | 207                      | 34 (16.4)                  | 0.72 (0.53 - 0.98)  | 0.77 (0.56 - 1.04)             | 234                       | 44 (17.5)                  | 0.86 (0.648 - 1.13) | 1.04 (0.79 - 1.35)             |
| Bedridden 1-6 days                 | 433     | 93 (21.5)                  | 1.03 (0.87 - 1.23)  | 1.05 (0.88 - 1.26)             | 15                       | 2 (13.3)                   | 0.96 (0.26 - 3.31)  | 0.95 (0.270 - 3.35)            | 184                      | 47 (25.5)                  | 1.17 (0.92 - 1.50)  | 1.21 (0.95 - 1.53)             | 234                       | 41 (18.8)                  | 0.91 (0.70 - 1.17)  | 0.94 (0.72 - 1.23)             |
| Bedridden 7 days or more           | 367     | 142 (38.7)                 | 2.12 (1.87 - 2.40)  | 1.69 (1.47 - 1.93)             | 9                        | 3 (33.3)                   | 2.05 (0.83 - 5.09)  | 1.51 (0.62 - 3.70)             | 97                       | 38 (39.2)                  | 2.09 (1.64 - 2.66)  | 1.60 (1.22 - 2.09)             | 261                       | 101 (38.7)                 | 2.09 (1.80 - 2.43)  | 1.75 (1.49 - 2.05)             |
| Non-Hospitalized                   | 2978    | 671 (22.5)                 | 1.12 (1.05 - 1.21)  | 1.16 (1.08 - 1.24)             | 208                      | 48 (23.1)                  | 1.43 (1.08 - 1.89)  | 1.43 (1.01 - 2.02)             | 918                      | 214 (23.3)                 | 1.08 (0.95 - 1.22)  | 1.09 (0.96 - 1.22)             | 1852                      | 409 (22.1)                 | 1.11 (1.01 - 1.22)  | 1.23 (1.12 - 1.35)             |

|                                                               |           |                  |                    |                    |     |            |                    |                    |     |            |                    |                    |      |            |                    |                    |   |
|---------------------------------------------------------------|-----------|------------------|--------------------|--------------------|-----|------------|--------------------|--------------------|-----|------------|--------------------|--------------------|------|------------|--------------------|--------------------|---|
| Hospitalized                                                  | 63        | 28 (44.4)        | 2.67 (2.08 - 3.43) | 1.67 (1.24 - 2.25) | 1   | 0 (0)      | -                  | -                  | 12  | 3 (25.0)   | 2.75 (1.24 - 6.10) | 1.44 (0.56 - 3.71) | 50   | 25 (50.0)  | 2.59 (1.99 - 3.36) | 1.76 (1.29 - 2.40) |   |
| <b>Anxiety symptoms (GAD-7 / ASS / EST-Q2)</b>                |           |                  |                    |                    |     |            |                    |                    |     |            |                    |                    |      |            |                    |                    |   |
| No confirmed diagnosis                                        | 20<br>327 | 2755<br>(13.6)   | Ref.               | Ref.               | -   | -          | -                  | -                  | -   | -          | -                  | -                  | -    | -          | -                  | -                  | - |
| Ever diagnosed with COVID-19                                  | 3154      | 429 (13.6)       | 0.93 (0.85 - 1.02) | 0.95 (0.87 - 1.05) | 212 | 24 (11.3)  | 0.91 (0.61 - 1.36) | 1.04 (0.66 - 1.65) | 958 | 125 (13.0) | 0.85 (0.72 - 1.01) | 0.85 (0.71 - 1.00) | 1984 | 280 (14.1) | 0.94 (0.84 - 1.06) | 1.03 (0.92 - 1.16) |   |
| Never bedridden                                               | 474       | 47 (9.9)         | 0.64 (0.49 - 0.88) | 0.71 (0.55 - 0.92) | 12  | 2 (16.7)   | 1.28 (0.33 - 5.00) | 1.02 (0.31 - 3.34) | 211 | 20 (9.5)   | 0.61 (0.40 - 0.92) | 0.64 (0.43 - 0.96) | 251  | 25 (10.0)  | 0.63 (0.44 - 0.91) | 0.74 (0.52 - 1.06) |   |
| Bedridden 1-6 days                                            | 459       | 69 (15.0)        | 1.01 (0.82 - 1.25) | 1.03 (0.84 - 1.28) | 15  | 2 (13.3)   | 1.53 (0.42 - 5.60) | 1.51 (0.37 - 6.14) | 193 | 33 (17.1)  | 1.15 (0.85 - 1.55) | 1.16 (0.86 - 1.56) | 251  | 34 (13.5)  | 0.87 (0.64 - 1.18) | 0.91 (0.67 - 1.24) |   |
| Bedridden 7 days or more                                      | 377       | 86 (22.8)        | 1.78 (1.48 - 2.13) | 1.46 (1.21 - 1.77) | 9   | 1 (11.1)   | 1.01 (0.16 - 6.18) | 0.76 (0.17 - 3.46) | 99  | 23 (23.2)  | 1.81 (1.31 - 2.49) | 1.43 (1.00 - 2.06) | 269  | 62 (23.0)  | 1.72 (1.38 - 2.14) | 1.49 (1.19 - 1.86) |   |
| Non-Hospitalized                                              | 3070      | 413 (13.5)       | 0.91 (0.83 - 1.00) | 0.95 (0.86 - 1.04) | 211 | 24 (11.4)  | 0.91 (0.61 - 1.36) | 1.04 (0.66 - 1.65) | 943 | 124 (13.1) | 0.85 (0.72 - 1.01) | 0.85 (0.72 - 1.01) | 2    | 265 (13.8) | 0.91 (0.81 - 1.03) | 1.02 (0.91 - 1.15) |   |
| Hospitalized                                                  | 65        | 15 (23.1)        | 1.75 (1.16 - 2.63) | 1.13 (0.74 - 1.75) | 1   | 0 (0)      | -                  | -                  | 12  | 1 (8.3)    | 0.91 (0.15 - 5.49) | 0.51 (0.07 - 3.87) | 52   | 14 (26.9)  | 1.74 (1.14 - 2.65) | 1.24 (0.80 - 1.91) |   |
| <b>COVID-19 related distress symptoms (PC-PTSD-5 / PCL-5)</b> |           |                  |                    |                    |     |            |                    |                    |     |            |                    |                    |      |            |                    |                    |   |
| No confirmed diagnosis                                        | 20<br>134 | 10 702<br>(53.2) | Ref.               | Ref.               | -   | -          | -                  | -                  | -   | -          | -                  | -                  | -    | -          | -                  | -                  | - |
| Ever diagnosed with COVID-19                                  | 2800      | 1546 (55.2)      | 1.03 (0.99 - 1.07) | 1.03 (1.00 - 1.07) | 205 | 118 (57.6) | 1.08 (0.95 - 1.23) | 1.15 (0.97 - 1.36) | 883 | 483 (54.7) | 1.03 (0.97 - 1.10) | 1.03 (0.97 - 1.10) | 1712 | 945 (55.2) | 1.02 (0.98 - 1.07) | 1.04 (1.00 - 1.09) |   |
| Never bedridden                                               | 456       | 216 (47.4)       | 0.89 (0.81 - 0.98) | 0.92 (0.84 - 1.02) | 12  | 7 (58.3)   | 1.08 (0.68 - 1.72) | 1.07 (0.67 - 1.72) | 208 | 98 (47.1)  | 0.89 (0.77 - 1.03) | 0.91 (0.79 - 1.04) | 236  | 111 (47.0) | 0.88 (0.77 - 1.01) | 0.94 (0.82 - 1.07) |   |
| Bedridden 1-6 days                                            | 432       | 229 (53.0)       | 0.98 (0.90 - 1.07) | 0.99 (0.91 - 1.08) | 16  | 8 (50.0)   | 0.99 (0.61 - 1.61) | 0.99 (0.60 - 1.63) | 183 | 98 (53.6)  | 1.00 (0.88 - 1.15) | 1.00 (0.87 - 1.14) | 233  | 123 (52.8) | 0.97 (0.86 - 1.10) | 0.99 (0.87 - 1.12) |   |
| Bedridden 7 days or more                                      | 366       | 241 (65.8)       | 1.22 (1.13 - 1.31) | 1.15 (1.07 - 1.24) | 9   | 5 (55.6)   | 1.06 (0.60 - 1.88) | 0.94 (0.53 - 1.69) | 98  | 61 (62.2)  | 1.19 (1.03 - 1.39) | 1.12 (0.96 - 1.31) | 259  | 175 (67.6) | 1.23 (1.13 - 1.34) | 1.18 (1.08 - 1.28) |   |





|                                                           |           |                |                  |                  |     |           |                  |                  |    |           |                  |                  |    |        |                  |                  |
|-----------------------------------------------------------|-----------|----------------|------------------|------------------|-----|-----------|------------------|------------------|----|-----------|------------------|------------------|----|--------|------------------|------------------|
| Bedridden 1-6 days                                        | -         | -              | -                | -                | -   | -         | -                | -                | -  | -         | -                | -                | -  | -      | -                | -                |
| Bedridden 7 days or more                                  | -         | -              | -                | -                | -   | -         | -                | -                | -  | -         | -                | -                | -  | -      | -                | -                |
| Non-Hospitalized                                          | -         | -              | -                | -                | -   | -         | -                | -                | -  | -         | -                | -                | -  | -      | -                | -                |
| Hospitalized                                              | -         | -              | -                | -                | -   | -         | -                | -                | -  | -         | -                | -                | -  | -      | -                | -                |
| <b>Sleep quality (PSQI, EST-Q2, Single-item measures)</b> |           |                |                  |                  |     |           |                  |                  |    |           |                  |                  |    |        |                  |                  |
| No confirmed diagnosis                                    | 17<br>374 | 5155<br>(29.7) | Ref.             | Ref.             | -   | -         | -                | -                | -  | -         | -                | -                | -  | -      | -                | -                |
| Ever diagnosed with COVID-19                              | 293       | 108 (36.9)     | 1.12 (0.96-1.32) | 1.03 (0.74-1.44) | 190 | 67 (35.3) | 1.08 (0.88-1.32) | 1.04 (0.75-1.45) | 93 | 36 (38.7) | 1.20 (0.92-1.57) | 1.23 (0.94-1.62) | 10 | 5 (50) | 1.33 (0.61-2.87) | 1.39 (0.62-3.13) |
| Never bedridden                                           | -         | -              | -                | -                | -   | -         | -                | -                | -  | -         | -                | -                | -  | -      | -                | -                |
| Bedridden 1-6 days                                        | -         | -              | -                | -                | -   | -         | -                | -                | -  | -         | -                | -                | -  | -      | -                | -                |
| Bedridden 7 days or more                                  | -         | -              | -                | -                | -   | -         | -                | -                | -  | -         | -                | -                | -  | -      | -                | -                |
| Non-Hospitalized                                          | 260       | 92 (35.4)      | 1.08 (0.90-1.28) | 0.94 (0.64-1.37) | 162 | 52 (32.1) | 0.96 (0.75-1.22) | 0.84 (0.55-1.28) | 88 | 35 (39.8) | 1.26 (0.97-1.64) | 1.31 (1.00-1.71) | 10 | 5 (50) | 1.33 (0.61-2.87) | 1.39 (0.62-3.13) |
| Hospitalized                                              | 31        | 14 (45.2)      | 1.43 (0.95-2.16) | 1.28 (0.82-2.01) | 26  | 13 (50)   | 1.67 (1.14-2.45) | 1.55 (1.03-2.35) | 5  | 1 (20)    | 0.00 (0.00-0.00) | 0.00 (0.00-0.00) | -  | -      | -                | -                |

|                                    | <b>Overall</b> |                                  |                                 |                                  |                                 |                                  |                                  |                                  |
|------------------------------------|----------------|----------------------------------|---------------------------------|----------------------------------|---------------------------------|----------------------------------|----------------------------------|----------------------------------|
|                                    | N = 247 519    |                                  |                                 |                                  |                                 |                                  |                                  |                                  |
|                                    | <b>Overall</b> |                                  | <b>Diagnosed 0-2 months ago</b> |                                  | <b>Diagnosed 2-6 months ago</b> |                                  | <b>Diagnosed 6-16 months ago</b> |                                  |
|                                    | <b>n</b>       | <b>n<sub>threshold</sub> (%)</b> | <b>n</b>                        | <b>n<sub>threshold</sub> (%)</b> | <b>n</b>                        | <b>n<sub>threshold</sub> (%)</b> | <b>n</b>                         | <b>n<sub>threshold</sub> (%)</b> |
| <b>Depression (PHQ-9 / EST-Q2)</b> |                |                                  |                                 |                                  |                                 |                                  |                                  |                                  |
| No confirmed diagnosis             | 197243         | 22241 (11.3)                     | -                               |                                  |                                 |                                  |                                  |                                  |
| Ever diagnosed with COVID-19       | 8150           | 1643 (20.2)                      | 2547                            | 523 (20.5)                       | 3192                            | 611 (19.1)                       | 2393                             | 507 (21.2)                       |
| Never bedridden                    | 2585           | 353 (13.7)                       | 1001                            | 136 (13.6)                       | 1163                            | 155 (13.3)                       | 421                              | 65 (15.4)                        |
| Bedridden 1-6 days                 | 2230           | 452 (20.3)                       | 866                             | 189 (21.8)                       | 961                             | 197 (20.5)                       | 403                              | 63 (15.6)                        |
| Bedridden 7 days or more           | 1030           | 299 (29)                         | 272                             | 77 (28.3)                        | 438                             | 112 (25.6)                       | 320                              | 110 (34.4)                       |

|                                                                |        |              |      |            |      |            |         |             |
|----------------------------------------------------------------|--------|--------------|------|------------|------|------------|---------|-------------|
| Non-Hospitalized                                               | 6593   | 1373 (20.8)  | 1840 | 400 (21.7) | 2645 | 529 (20)   | 2108    | 444 (21.1)  |
| Hospitalized                                                   | 200    | 69 (34.5)    | 64   | 27 (42.2)  | 70   | 13 (18.6)  | 66      | 29 (43.9)   |
| <b>Anxiety symptoms (GAD-7 / ASS / EST-Q2)</b>                 |        |              |      |            |      |            |         |             |
| No confirmed diagnosis                                         | 204151 | 15140 (7.4)  |      |            |      |            |         |             |
| Ever diagnosed with COVID-19                                   | 8249   | 1076 (13)    | 2631 | 362 (13.8) | 3159 | 393 (12.4) | 2459    | 317 (12.9)  |
| Never bedridden                                                | 2602   | 267 (10.3)   | 1005 | 118 (11.7) | 1159 | 107 (9.2)  | 438     | 38 (8.7)    |
| Bedridden 1-6 days                                             | 2257   | 300 (13.3)   | 868  | 122 (14.1) | 969  | 135 (13.9) | 420     | 40 (9.5)    |
| Bedridden 7 days or more                                       | 1047   | 194 (18.5)   | 283  | 48 (17)    | 436  | 77 (17.7)  | 328     | 69 (21)     |
| Non-Hospitalized                                               | 6688   | 971 (14.5)   | 1856 | 313 (16.9) | 2660 | 366 (13.8) | 257.916 | 292 (113.2) |
| Hospitalized                                                   | 203    | 39 (19.2)    | 68   | 18 (26.5)  | 67   | 6 (9)      | 68      | 15 (22.1)   |
| <b>COVID-19 related distress symptoms (PC-PTSD-5 / PCL-5)</b>  |        |              |      |            |      |            |         |             |
| No confirmed diagnosis                                         | 74902  | 23859 (31.9) |      |            |      |            |         |             |
| Ever diagnosed with COVID-19                                   | 5165   | 2116 (41)    | 1260 | 401 (31.8) | 1840 | 713 (38.8) | 2065    | 1002 (48.5) |
| Never bedridden                                                | 1444   | 416 (28.8)   | 482  | 113 (23.4) | 603  | 175 (29)   | 359     | 128 (35.7)  |
| Bedridden 1-6 days                                             | 1438   | 505 (35.1)   | 464  | 140 (30.2) | 603  | 214 (35.5) | 371     | 151 (40.7)  |
| Bedridden 7 days or more                                       | 627    | 316 (50.4)   | 129  | 47 (36.4)  | 197  | 90 (45.7)  | 301     | 179 (59.5)  |
| Non-Hospitalized                                               | 3774   | 1693 (44.9)  | 610  | 213 (34.9) | 1373 | 568 (41.4) | 1791    | 912 (50.9)  |
| Hospitalized                                                   | 124    | 55 (44.4)    | 24   | 10 (41.7)  | 42   | 16 (38.1)  | 58      | 32 (55.2)   |
| <b>Sleep quality (PSQI, BIS, EST-Q2, Single-item measures)</b> |        |              |      |            |      |            |         |             |
| No confirmed diagnosis                                         | 143265 | 34060 (23.8) |      |            |      |            |         |             |
| Ever diagnosed with COVID-19                                   | 7510   | 2211 (29.4)  | 2100 | 620 (29.5) | 3065 | 947 (30.9) | 2345    | 644 (27.5)  |
| Never bedridden                                                | 2361   | 624 (26.4)   | 746  | 198 (26.5) | 1144 | 308 (26.9) | 471     | 118 (25.1)  |
| Bedridden 1-6 days                                             | 1813   | 538 (29.7)   | 630  | 182 (28.9) | 829  | 265 (32)   | 354     | 91 (25.7)   |
| Bedridden 7 days or more                                       | 1338   | 499 (37.3)   | 329  | 117 (35.6) | 545  | 217 (39.8) | 464     | 165 (35.6)  |
| Non-Hospitalized                                               | 7107   | 2065 (29.1)  | 1981 | 575 (29)   | 2928 | 898 (30.7) | 2198    | 592 (26.9)  |
| Hospitalized                                                   | 213    | 92 (43.2)    | 63   | 29 (46)    | 72   | 29 (40.3)  | 78      | 34 (43.6)   |

<sup>a</sup> Adjusted for gender, age, education, relationship status, smoking, BMI, previous psychiatric diagnosis, number of comorbidities and response period

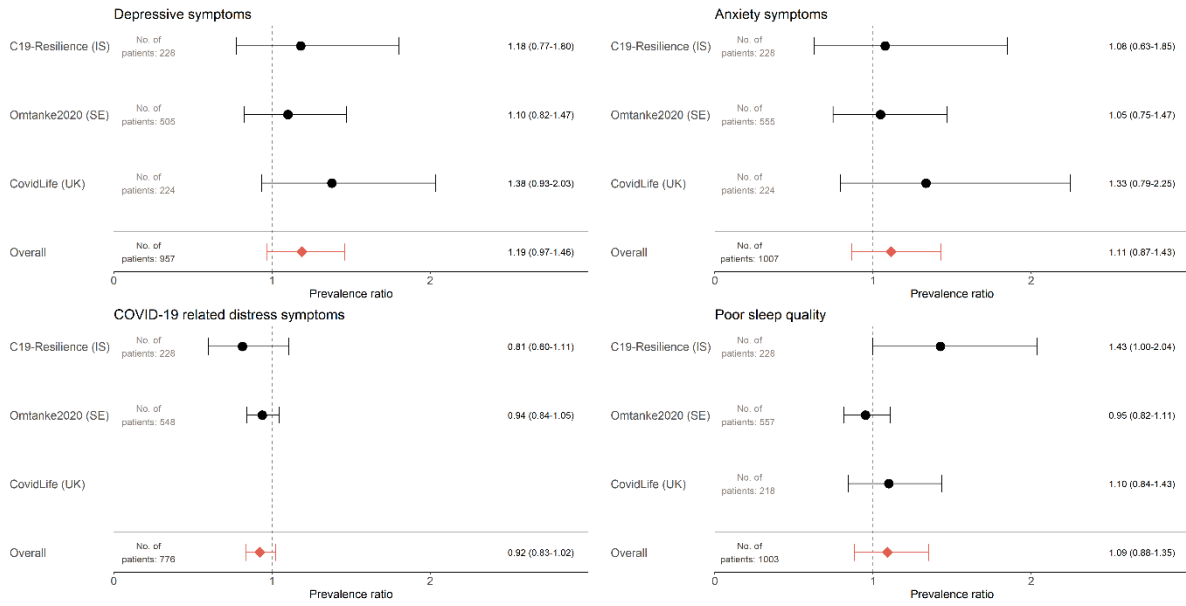

**Figure S2: Change in mental health indicators before and after diagnosis of COVID-19, sub-analysis within cohorts with repeated measures (Median time between follow up for cohorts: C19-Resilience: 7.3 months, Omtanke2020: 1 month, CovidLife: 10 months).**

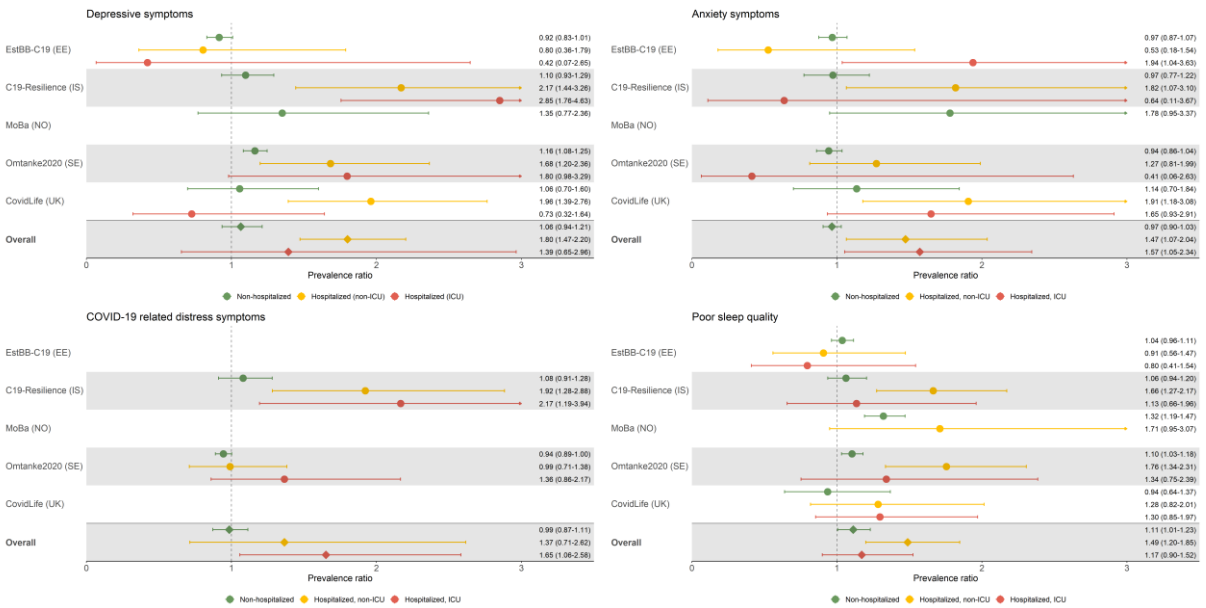

**Figure S3: Mental health indicators among individuals with a diagnosis of COVID-19 compared with individuals without COVID-19 by hospitalization status.**



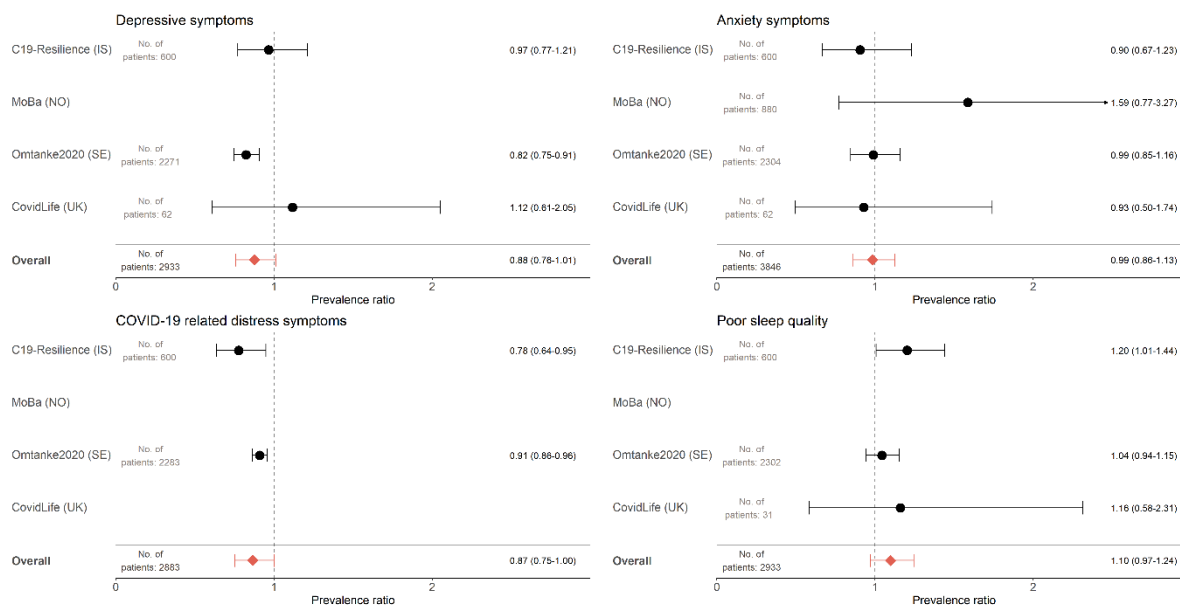

Figure S4: Change in mental health indicators from first to last measure after diagnosis of COVID-19, sub-analysis of patients with COVID-19 with repeated measures (Median time between follow up for cohorts: C19-Resilience: 12.7 months, MoBa: 10.1 months, Omtanke2020: 6 months, CovidLife: 10 months).

Table S5: Overall prevalence ratios of mental health indicators during the first 16 months after diagnosis of COVID-19 by illness severity

| Mental health indicator | Time since diagnosis | Time spent bedridden | PR (95% confidence interval) |
|-------------------------|----------------------|----------------------|------------------------------|
| Depressive symptoms     | 0–2 months           | Never bedridden      | 0.84 (0.69-1.03)             |
|                         |                      | 1–6 days             | 1.32 (0.85-2.04)             |
|                         |                      | > 7 days             | 1.66 (1.11-2.47)             |
|                         | 2–6 months           | Never bedridden      | 0.76 (0.66-0.89)             |
|                         |                      | 1–6 days             | 1.21 (0.89-1.63)             |
|                         |                      | > 7 days             | 1.53 (1.26-1.86)             |
|                         | 6–16 months          | Never bedridden      | 0.96 (0.77-1.19)             |
|                         |                      | 1–6 days             | 0.97 (0.78-1.21)             |
|                         |                      | > 7 days             | 1.60 (1.17-2.18)             |
| Anxiety symptoms        | 0–2 months           | Never bedridden      | 0.91 (0.78-1.07)             |
|                         |                      | 1–6 days             | 1.01 (0.86-1.18)             |
|                         |                      | > 7 days             | 1.47 (0.80-2.72)             |
|                         | 2–6 months           | Never bedridden      | 0.71 (0.55-0.92)             |
|                         |                      | 1–6 days             | 1.03 (0.87-1.22)             |
|                         |                      | > 7 days             | 1.46 (1.20-1.79)             |
|                         | 6–16 months          | Never bedridden      | 0.87 (0.60-1.26)             |
|                         |                      | 1–6 days             | 0.82 (0.58-1.17)             |
|                         |                      | > 7 days             | 1.47 (1.19-1.81)             |

|                                           |             |                 |                  |
|-------------------------------------------|-------------|-----------------|------------------|
| <i>COVID-19 related distress symptoms</i> | 0–2 months  | Never bedridden | 1.01 (0.86-1.19) |
|                                           |             | 1–6 days        | 1.22 (1.06-1.39) |
|                                           |             | > 7 days        | 1.78 (1.29-2.46) |
|                                           | 2–6 months  | Never bedridden | 0.82 (0.47-1.42) |
|                                           |             | 1–6 days        | 1.05 (0.86-1.27) |
|                                           |             | > 7 days        | 1.17 (0.93-1.47) |
|                                           | 6–16 months | Never bedridden | 0.88 (0.73-1.06) |
|                                           |             | 1–6 days        | 0.91 (0.72-1.15) |
|                                           |             | > 7 days        | 1.01 (0.52-1.96) |
| <i>Poor sleep quality</i>                 | 0–2 months  | Never bedridden | 0.94 (0.84-1.06) |
|                                           |             | 1–6 days        | 0.98 (0.86-1.11) |
|                                           |             | > 7 days        | 1.35 (1.11-1.64) |
|                                           | 2–6 months  | Never bedridden | 0.98 (0.87-1.11) |
|                                           |             | 1–6 days        | 1.14 (0.96-1.35) |
|                                           |             | > 7 days        | 1.48 (1.29-1.69) |
|                                           | 6–16 months | Never bedridden | 1.02 (0.87-1.20) |
|                                           |             | 1–6 days        | 0.95 (0.71-1.27) |
|                                           |             | > 7 days        | 1.26 (0.90-1.77) |

## References

1. Ritchie H, Mathieu E, Rodés-Guirao L, et al. Coronavirus Pandemic (COVID-19). *Published online at OurWorldinData.org* 2020; (Retrieved from: ['https://ourworldindata.org/coronavirus'](https://ourworldindata.org/coronavirus) [Online Resource]).
